1 **Single-cell RNA sequencing-based characterization of resident lung**  
2 **mesenchymal stromal cells in bronchopulmonary dysplasia**

3 I. Mižiková<sup>1,2</sup>, F. Lesage<sup>1,2</sup>, C. Cyr-Depauw<sup>1,2</sup>, D. P. Cook<sup>2,3</sup>, M. Hurskainen<sup>1,2,4,5</sup>, S.M.  
4 Hänninen<sup>6</sup>, A. Vadivel<sup>1</sup>, P. Bardin<sup>1,2</sup>, S. Zhong<sup>1</sup>, O. Carpen<sup>6</sup>, B. C. Vanderhyden<sup>2,3,8</sup>, B.  
5 Thébaud<sup>1,2,7</sup>

6

7 <sup>1</sup> Sinclair Centre for Regenerative Medicine, Ottawa Hospital Research Institute, Ottawa, ON,  
8 Canada

9 <sup>2</sup> Department of Cellular and Molecular Medicine, University of Ottawa, Ottawa, Ontario,  
10 Canada

11 <sup>3</sup> Cancer Therapeutics Program, Ottawa Hospital Research Institute, Ottawa, Ontario, Canada

12 <sup>4</sup> Division of Pediatric Cardiology, New Children's Hospital, Helsinki University Hospital and  
13 University of Helsinki, Helsinki, Finland

14 <sup>5</sup> Pediatric Research Center, New Children's Hospital, University of Helsinki and Helsinki  
15 University Hospital, Helsinki, Finland

16 <sup>6</sup> Precision Cancer Pathology, Department of Pathology and Research Program in Systems  
17 Oncology, University of Helsinki and HUS Diagnostic Center, Helsinki University Hospital,  
18 Helsinki, Finland

19 <sup>7</sup> Department of Pediatrics, Children's Hospital of Eastern Ontario (CHEO) and CHEO Research  
20 Institute, University of Ottawa, Ottawa, Ontario, Canada

21 <sup>8</sup> Department of Obstetrics and Gynecology, University of Ottawa/The Ottawa Hospital, Ottawa,  
22 Ontario, Canada

23

24

25

26 **ABSTRACT (limit 250 words)**

27 Late lung development is a period of alveolar and microvascular formation, which is pivotal in  
28 ensuring sufficient and effective gas exchange. Defects in late lung development manifest in  
29 premature infants as a chronic lung disease named bronchopulmonary dysplasia (BPD).  
30 Numerous studies demonstrated the therapeutic properties of exogenous bone marrow and  
31 umbilical cord-derived mesenchymal stromal cells (MSCs) in experimental BPD. However, very  
32 little is known regarding the regenerative capacity of resident lung MSCs (L-MSCs) during  
33 normal development and in BPD. In this study we aimed to characterize the L-MSC population  
34 in homeostasis and upon injury. We used single-cell RNA sequencing (scRNA-seq) to profile *in*  
35 *situ* *Ly6a*<sup>+</sup> L-MSCs in the lungs of normal and O<sub>2</sub>-exposed neonatal mice (a well-established  
36 model to mimic BPD) at three developmental timepoints (postnatal days 3, 7 and 14). Hyperoxia  
37 exposure increased the number, and altered the expression profile of L-MSCs, particularly by  
38 increasing the expression of multiple pro-inflammatory, pro-fibrotic, and anti-angiogenic genes.  
39 In order to identify potential changes induced in the L-MSCs transcriptome by storage and  
40 culture, we profiled 15,000 *Ly6a*<sup>+</sup> L-MSCs after *in vitro* culture. We observed great differences  
41 in expression profiles of *in situ* and cultured L-MSCs, particularly those derived from healthy  
42 lungs. Additionally, we have identified the location of L-MSCs in the developing lung and  
43 propose *Serpinf1* as a novel, culture-stable marker of L-MSCs. Finally, cell communication  
44 analysis suggests inflammatory signals from immune and endothelial cells as main drivers of  
45 hyperoxia-induced changes in L-MSCs transcriptome.

## 46 1. INTRODUCTION

47 Late lung development represents an important period in lung maturation marked by an  
48 exponential increase in the gas exchange surface area by forming the most distal respiratory  
49 units, the alveoli. Within these units, respiration takes place across a thin (0.2 - 2 $\mu$ m) alveolo-  
50 capillary barrier. Formation of alveolar structures, a process known as alveolarization, is  
51 facilitated by spatially and temporarily coordinated interactions between diverse cell types and  
52 the pulmonary microenvironment [1]. Defects in late lung development in humans manifest as  
53 bronchopulmonary dysplasia (BPD), a multifactorial disease occurring as a consequence of  
54 premature birth, respiratory distress, and associated treatments in neonatal intensive care. BPD is  
55 the most common chronic disease in children and a leading cause of death in children under the  
56 age of 5 [1,2]. BPD is also associated with neurodevelopmental delay, increased incidence of  
57 asthma, re-hospitalizations and early-onset emphysema [3,4].

58 To date, multiple studies have demonstrated the lung protective effects of exogenous,  
59 bone marrow (BM)- or umbilical cord (UC)-derived, mesenchymal stromal cells (MSCs) in  
60 experimental BPD models [5–10]. The discovery of lung resident (L-)MSCs prompted questions  
61 regarding the apparent insufficient regenerative capacity of L-MSCs in lung injury [11].  
62 Characterizing the L-MSC population in homeostasis and upon injury is pivotal in understanding  
63 the apparent contradiction between the therapeutic effects of exogenous MSCs, while the  
64 resident population fails to prevent neonatal lung injury from occurring. However, very little is  
65 currently known about the role of L-MSCs in postnatal lung development and in BPD. Lung  
66 stromal cells, including lipofibroblasts, myofibroblasts and matrix fibroblasts are a potent source  
67 of inter-cellular signaling and are known to play an important role in BPD pathogenesis [12].  
68 However, how L-MSCs communicate with other cell populations and contribute to the  
69 development of BPD remains unknown.

70 While most authors report that L-MSCs can differentiate, to some extent, into  
71 chondroblasts, osteoblasts and adipocytes [13], form colonies *in vitro* [13,14], and express  
72 classical MSC markers THY1 (CD90), NT5E (CD73) and ENG (CD105) [13,15], no L-MSC-  
73 specific marker has yet been established. Due to the lack of standardization for L-MSC  
74 identification, as well as differences in expression profiles between species, no single marker has  
75 been broadly accepted. Lung mesenchymal progenitor cell markers have been proposed [13,15–

76 18], including LY6A, often referred to as SCA-1 (Stem cell antigen 1) [16–19]. LY6A was  
77 proposed as a defining progenitor marker for mesenchymal cell lineages in the lung [19] and  
78 LY6A<sup>+</sup> mesenchymal lung cells were shown to promote colony formation, proliferation and  
79 differentiation of epithelial progenitor cells [20].

80 In the study presented here we identify, for the first time, the transcriptome of *Ly6a*<sup>+</sup> L-  
81 MSCs in healthy and diseased developing mouse lungs. We hypothesized, that O<sub>2</sub>-exposure (a  
82 well-established model to mimic BPD) significantly impacts the phenotype and function of L-  
83 MSCs, as well as cellular communication between L-MSCs and other cell populations in the  
84 developing lung. We identify perturbations to the phenotype and functional properties of L-  
85 MSCs in this model. Furthermore, we report extensive single-cell RNA sequencing (scRNA-seq)  
86 profiling of L-MSCs in the lungs of 36 healthy and O<sub>2</sub>-exposed mice at three developmental  
87 timepoints (P3, P7, and P14). Finally, we investigate cultured *Ly6a*<sup>+</sup> L-MSCs and *Ly6a*<sup>-</sup> mouse  
88 lung stromal cells by scRNA-seq. We identify changes in L-MSCs transcription profile induced  
89 by storage and culture and present novel, culture-stable marker for this rare progenitor  
90 population.



## 91 2. MATERIALS AND METHODS

### 92 2.1 Experimental animals

93 Pregnant C57BL/6N mice were purchased from Charles Rivers Laboratories, Saint Constant,  
94 QC, Canada at embryonic day (E)15. Mice were housed by the Animal Care and Veterinary  
95 Service of the University of Ottawa in accordance with institutional guidelines. All study  
96 protocols were approved by the animal ethics and research committee of the University of  
97 Ottawa (protocol OHRI-1696) and conducted according to guidelines from the Canadian Council  
98 on Animal Care (CCAC). Mouse pups born on the same day, were randomized at the day of birth  
99 [postnatal day (P)0] and divided into equal-sized litters of 6-8 pups/cage. Cages were then  
100 maintained either in room air (normoxia, 21% O<sub>2</sub>), or in normobaric hyperoxia (85% O<sub>2</sub>) until  
101 the day of harvest. The hyperoxic environment was maintained in sealed plexiglass chambers  
102 with continuous oxygen monitoring (BioSpherix, Redfield, NY). Mice were maintained in 12/12  
103 hours light/dark cycle and received food ad libidum. In order to avoid confounding factors  
104 associated with oxygen toxicity, nursing dams were rotated between normoxic and hyperoxic  
105 group every 48 hours. Euthanasia was performed by an intraperitoneal (i.p.) injection of 10 µl/g  
106 Pentobarbital Sodium (CDMV, Saint-Hyacinthe, QC, Canada).

107

### 108 2.2 Lung isolation

109 Mouse pups designated for mean linear intercept (MLI) assessment or fluorescent in situ  
110 hybridization (FISH) were euthanized at P7 and P14, respectively. Following euthanasia, the  
111 chest was opened, mice were tracheotomized and lungs were installation-fixed for 5 minutes at  
112 20cm H<sub>2</sub>O hydrostatic pressure. Lungs designated for histological assessment were fixed with  
113 1.5% (w/v) paraformaldehyde (PFA) (Sigma-Aldrich, Oakville, ON, Canada) and 1.5% (w/v)  
114 glutaraldehyde (Sigma-Aldrich, Oakville, ON, Canada) in 150mM HEPES (Sigma-Aldrich,  
115 Oakville, ON, Canada). Lungs designated for FISH were fixed with 4% (w/v) PFA (Sigma-  
116 Aldrich, Oakville, ON, Canada). In both instances, lungs were kept in the fixation solution for 48  
117 hours at 4°C and collected for embedding in paraffin. Paraffin-embedded tissue blocks  
118 designated for histological analyses were sectioned at 3 or 4µm as needed. Tissue dehydration,  
119 paraffin embedding and sectioning were performed by the University of Ottawa Louise Pelletier  
120 Histology Core Facility.

121 Mouse pups designated for lung cells isolation and fluorescence activated cell sorting  
122 (FACS) analyses were euthanized at P7. Mice also received an i.p. injection of 10 mU/g Heparin  
123 Sodium (LEO Pharma INC., Thornhill, ON, Canada). Following euthanasia, the chest was  
124 opened and the left atrium was perforated. Lungs were perfused through the right ventricle with  
125 5 ml of 25 U/ml Heparin Sodium in DPBS supplemented with  $Mg^{2+}/Ca^{2+}$  (ThermoFisher  
126 Scientific, Burlington, ON, Canada) until white. Lungs were removed from the thoracic cavity,  
127 dissected into individual lobes, and digested in enzyme mix at 37°C by gentleMACS™ Octo  
128 Dissociator (Miltenyi Biotech, Bergisch Gladbach, Germany). The detailed procedure, as well as  
129 enzyme mixture contents are provided in Supplementary Method S1. The suspension was then  
130 centrifuged and the resulting pellet was washed with 5 ml of 5% FBS (Sigma-Aldrich, Oakville,  
131 ON, Canada) in 1× DPBS (Lonza, Basel, Switzerland), filtered through 70 µm filter (Corning  
132 Life Sciences, Tewksbury, MA, USA) and centrifuged again. The resulting pellet was  
133 resuspended in 1ml of cold RBC lysis buffer (ThermoFisher Scientific, Burlington, ON, Canada)  
134 for 3 minutes at room temperature (RT). The cell suspension was then diluted with 5ml of 5%  
135 FBS solution, centrifuged and washed twice.

136 A detailed flowchart illustrating the allocation of each mice to respective experimental  
137 groups is depicted in Supplementary figure 1.

138

### 139 **2.3 Mean linear intercept (MLI) measurement**

140 Paraffin-embedded tissue blocks were sectioned at 4µm, stained with hematoxylin and eosin  
141 (H&E) stain, and scanned using the Axio Scan.Z1 (Zeiss, Oberkochen, Germany). The mean  
142 linear intercept (MLI) was estimated with Fiji/ImageJ software using a 64-point grid as described  
143 previously [21]. A total of 20 randomly selected 500µm×500µm fields of view were assessed in  
144 each lung.

145

### 146 **2.4 Fluorescent activated cell sorting (FACS)**

147 The number of cells in the single-cell suspension was estimated using the EVE NanoEnTek  
148 automatic cell counter and a total of  $1 \times 10^6$  cells/sample were resuspended in 550 µl of FACS  
149 buffer (5% (v/v) FBS and 1mM EDTA in 1×DPBS). Cells were then incubated at RT in the dark

150 with 2  $\mu\text{l}/1\times 10^6$  cells of CD16/32 antibody for 15 minutes. Following blocking, cells were  
151 centrifuged and pellets were resuspended in 1:100 mixture of panel of antibodies: FITC-CD31,  
152 AF647-CD45, Pe/Cy7- CD326, and BV421- LY-6A/E (Supplementary table 1). Cells were  
153 incubated with antibodies for 20 minutes in dark at RT, pelleted and washed 3x with FACS  
154 buffer. FACS was performed immediately using a MoFlo XDP (XDP, Beckman Coulter,  
155 Fullerton, CA, USA) and compensation and analysis was done using Summit v.5.4 at the Ottawa  
156 Hospital Research Institute (OHRI) StemCore facility.

157

## 158 **2.5 Cell culture and storage**

159 The detailed procedure is provided in Supplementary Method S2.

160

## 161 **2.6 Colony formation assay**

162 The detailed procedure is provided in Supplementary Method S3.

163

## 164 **2.7 MSCs surface marker profiling**

165 Cultured, passage 3 CD31<sup>-</sup>/CD45<sup>-</sup>/EpCAM<sup>-</sup>/LY6A<sup>+</sup> L-MSCs were profiled for MSC surface  
166 markers by flow cytometry. Briefly,  $3\times 10^5$  cells/sample were resuspended in 200  $\mu\text{l}$  of FACS  
167 buffer in 96-well plate and incubated at RT in the dark with 2  $\mu\text{l}/1\times 10^6$  cells of CD16/32  
168 antibody for 15 minutes. Cells were then divided to 3 equal fractions, centrifuged and  
169 resuspended in one of the following 1:100 mixture of antibodies: i) BV421-CD31, Pe/Cy7-  
170 conjugated CD326, PE-CD73, and AF488- D105; ii) AF647- CD45, BV421-LY-6A/E, PE-  
171 conjugated CD34, and AF488-CD146; iii) PB-CD90.2 (Supplementary table 1). Cells were  
172 incubated with antibodies for 20 minutes in dark at RT, pelleted and washed 3x with FACS  
173 buffer. Flow cytometry was performed immediately using a MoFlo XDP (XDP, Beckman  
174 Coulter, Fullerton, CA, USA) and compensation and analysis was done using Summit v.5.4 at  
175 the OHRI core facility.

176

177 **2.8 Osteogenic differentiation**

178 The detailed procedure is provided in Supplementary Method S4.

179

180 **2.9 Adipogenic differentiation**

181 The detailed procedure is provided in Supplementary Method S5.

182

183 **2.10 Chondrogenic differentiation**

184 The detailed procedure is provided in Supplementary Method S6.

185

186 **2.11. Fluorescent in situ hybridization**

187 The detailed procedure, as well as a list of used probes are provided in Supplementary Method  
188 S7.

189

190 **2.12. Multiplexing samples for scRNA-seq**

191 Multiplexing was performed according to the MULTI-seq protocol [22]. The detailed procedure  
192 is provided in Supplementary Method S8.

193

194 **2.13. scRNA-seq library preparation and sequencing**

195 Single-cell suspensions were processed using the 10x Genomics Single Cell 3' v3 RNA-seq kit  
196 by Ottawa Hospital Research Institute Stem Core Laboratories. Gene expression libraries were  
197 prepared according to the manufacturer's protocol. MULTI-seq barcode libraries were retrieved  
198 from the samples and libraries were prepared independently, as described previously[22]. Final  
199 libraries were sequenced on the NextSeq500 platform (Illumina) to reach an approximate depth  
200 of 20,000-25,000 reads/cell.

201

## 202 **2.14. scRNA-seq data analyses and quantification**

### 203 **Processing and demultiplexing**

204 Raw sequencing reads were processed using CellRanger v3.0.2 for lung homogenate sample and  
205 v3.1.0 for cultured cells, aligning reads to the mm10 build of the mouse genome. Except for  
206 explicitly setting `--expect-cells=25000`, default parameters were used for all samples. MULTI-  
207 seq barcode libraries were trimmed prior to demultiplexing to 28bp using Trimmomatic (v0.36).  
208 Demultiplexing was performed using the deMULTIplex R package (v1.0.2) as described  
209 previously[22,23]. Only cells positive for a single barcode were kept for further analysis and  
210 sample annotations were added to all cells in the data set.

211

### 212 **Quality control, integration, and clustering**

213 All main processing steps were performed with Seurat v.4.0.0[24]. Quality control was  
214 performed independently on each library to find appropriate filtering thresholds. Expression  
215 matrices were loaded as Seurat objects into R. Only cells with  $> 200$  genes detected and  $< 20\%$   
216 of UMIs mapped to mitochondrial genes were retained. Each unique sample was split based on  
217 MULTI-seq sample barcodes into a separate Seurat object. SCTransform[25] was used to  
218 normalize samples, select highly variable genes, and to regress out cell cycle and cell stress  
219 effects. To eliminate batch effects or biological variability effects on clustering, the data  
220 integration method implemented by Seurat for SCTransform-normalized data was performed,  
221 using the `SelectIntegrationFeatures()`, `PrepSCTIntegration()`, `FindIntegrationAnchors()`, and  
222 `IntegrateData()` functions. PCA was performed on the top 3000 variable genes and the data was  
223 clustered at a low resolution (`dims=1:30`, `resolution=0.2` for lung homogenate data and 0.1 for  
224 cultured MSCs) with the Louvain algorithm implemented in the `FindClusters()` function in  
225 Seurat. Cell populations were identified with a simple Wilcoxon rank sum test with the  
226 `FindAllMarkers()` function in Seurat.

227 In the case of stromal cells from lung homogenates, a previously published, publicly  
228 available scRNA-seq dataset from newborn mice was re-analyzed[23]. A novel Ly6a<sup>+</sup> L-MS  
229 population was identified based on the expression of Ly6a. New cell type labels for stromal  
230 populations were then added to the Seurat object containing all data.

231

232 **Differential expression analysis (DSA), gene set enrichment analysis (GSEA) and functional**  
233 **enrichment analysis**

234 To identify differentially expressed genes in response to hyperoxia or as a result of mouse age,  
235 we used the R package muscat (v1.4.0). Pseudobulk expression profiles were generated for each  
236 sample in each cluster and differential expression was tested between groups associated with the  
237 experimental conditions. Genes with an adjusted p-value  $< 0.05$  and a detection rate  $\geq 10\%$  in at  
238 least one of the conditions tested were considered significant. To further identify gene sets  
239 associated with differentially expressed genes, we used the R package fgsea (v1.16.0). List of  
240 gene sets comprised all GO terms, KEGG pathways, Reactome pathways, and the MSigDB  
241 Hallmark gene sets acquired from the Molecular Signatures Database (v7.2)[26]. Gene sets with  
242 an adjusted p-value  $< 0.05$  were considered significantly enriched. Normalized enrichment score  
243 (NES) was used to assess whether gene sets were associated with upregulated or downregulated  
244 genes. Functional enrichment analysis (FEA) for selected ligands produced by Ly6a+ L-MSCs  
245 were performed using the online Metascape tool[27]. Summary pathways relevant to lung were  
246 considered.

247

248 **Cell communication inference**

249 To explore cell communication networks behind the developmental age, or hyperoxia-specific  
250 effects, we utilized the R package nichenetr (v1.0.0), which uses information about expression of  
251 cognate ligands, receptors, signaling pathways, and genomic targets to infer cell communication  
252 patterns[28]. Differential gene expression analysis for P3 vs. P14, or hyperoxia vs. normoxia  
253 groups were used in the NicheNet analysis. To prioritize results, analysis was limited to signaling  
254 contributing to the effects in receiver cell types with  $>200$  differentially expressed genes at P14  
255 or in response to hyperoxia, but included all cell types as potential ligand senders. Background  
256 expression of genes was specified with default approach used in NicheNet's pipeline, using all  
257 genes with  $>10\%$  detection in a given cluster. While using cells from both experimental  
258 conditions, developmental age, or hyperoxia-induced ligands from cell types that increase in  
259 proportion with age or in hyperoxia samples were prioritized. For each "receiver" cell

260 population, top 10 ligands predicted to drive developmental age, or hyperoxia-induced responses  
261 were selected based on the Pearson correlation coefficient between the ligand-target regulatory  
262 potential score of each ligand and the target indicator vector. Further, we assessed whether the  
263 expression of ligands and receptors was upregulated, or whether the populations expressing the  
264 ligands increased in proportion in P14 or hyperoxia samples, respectively. Finally, potential  
265 target genes were inferred. Summaries of ligand-receptor interactions are represented in circos  
266 plots.

267

## 268 **2.15. Statistical analysis**

269 All statistical analyses were performed with GraphPad Prism 8.0. The presence of potential  
270 statistical outliers was determined by Grubbs' test. Data are presented as means  $\pm$  SD.  
271 Differences in case of two-member groups were evaluated either by unpaired Student's *t*-test, or  
272 multiple unpaired Student's *t*-test with correction for multiple comparisons using the Holm-  
273 Šidák method. P values  $< 0.05$  were considered as significant and depicted as following: P values  
274  $< 0.05$ : \*; P values  $< 0.01$ : \*\*; P values  $< 0.001$ : \*\*\*; P values  $< 0.0001$ : \*\*\*\*.

## 275 3. RESULTS

### 276 3.1 The developing murine lung contains a population of L-MSC marked by the expression 277 of *Ly6a*

278 In order to understand the expression patterns unique to LY6A<sup>+</sup> L-MSCs in the developing lung,  
279 we took advantage of a publicly available scRNA-seq dataset from newborn mice[23]. Within  
280 this dataset, we analyzed 7,994 stromal cells from normoxia or hyperoxia-exposed developing  
281 mouse pups on postnatal days (P)3, 7, and 14, clustered into 6 distinct populations (Fig. 1A).  
282 Based on the expression pattern of commonly used MSC markers (Supplementary fig. 2A) we  
283 selected *Ly6a* as most suitable marker to identify L-MSC in lung stroma. We then subsetted the  
284 *Ly6a*<sup>+</sup> cells, belonging almost exclusively to the *Col14a1*<sup>+</sup> fibroblasts, as a separate, seventh  
285 cluster (Fig. 1B). Differential gene expression analysis revealed that *Ly6a*<sup>+</sup> L-MSCs could be  
286 characterized by the expression of additional markers, including *Lum*, *Serpinf1*, or *Dcn*, with  
287 *Lum* being the single most unique identifier of the population (Fig. 1C, Supplementary table 2).  
288 It was previously shown to inhibit migration, invasion, and tube-formation in BM-MSCs[29],  
289 and was implicated in epithelial-mesenchymal transition and fibrocyte differentiation[30]. While  
290 *Ly6a*<sup>+</sup> L-MSCs expressed additional MSC markers *Mcam*, *Alcam* and *Eng*, their expression did  
291 not serve as a reliable indicator of *Ly6a*<sup>+</sup> L-MSCs (Fig. 1D).

292

### 293 3.2 The transcription profile and signaling activity of *Ly6a*<sup>+</sup> L-MSCs change significantly 294 during postnatal lung development

295 We first aimed to understand how the L-MSC population changes in the postnatal developing  
296 lung. While the size of the population remained unchanged between P3 and P7, the second week  
297 of lung development in healthy mice was associated with an increase in the size of the *Ly6a*<sup>+</sup>  
298 stromal population (Figure 1E-F, Supplementary table 3). Similarly, differential state analysis  
299 (DSA) in normally developing lungs revealed that most changes in gene expression occurred in  
300 L-MSC between P7 and P14 (Fig. 1G, Supplementary table 4). Although the expression of genes  
301 such as *Apoe*, *Inmt*, *Klf9* and *Abca1* was drastically increased in L-MSCs, these genes were also  
302 considerably upregulated in *Ly6a*<sup>-</sup> stromal cells (Supplementary table 4). The largest L-MSC -  
303 specific expression changes were observed for *Mmp3*, *C1s1*, *Podn*, *Dlk1*, and *Agtr2* (Fig. 1H).



304 Gene set enrichment analysis (GSEA) identified extracellular matrix (ECM) formation, vascular  
305 development, and wound healing among the activated pathways (Fig. 1I, Supplementary table 5).

306 Next, to further understand how L-MSCs send and receive signals during postnatal  
307 development, we performed a cell communication analysis. We inferred developmental age-  
308 induced cellular communications between *Ly6a*<sup>+</sup> L-MSCs and other lung populations using the  
309 NicheNet tool [23,28] (Fig. 2A, Supplementary fig. 3-5, Supplementary table 6). During  
310 development L-MSCs received signals from several cell populations, including endothelial cells,  
311 interstitial macrophages (Int Mf), alveolar epithelial type 2 (AT2) cells, and stromal cells (Fig.  
312 2A). *Col4a1*, *Fat1*, *Hmgb2*, *Vcam1* and *Hc* were identified as most potent ligands, targeting  
313 numerous downstream genes in the developing L-MSCs, including *Klf9*, *Top2a* and other  
314 strongly de-regulated genes (Fig. 2A-B, Figure 1G, Supplementary table 4). Furthermore, L-  
315 MSCs produced numerous ligands, targeting most lung cell populations, including itself (Fig.  
316 2A), Among the most broadly acting ligands were *Agt*, *App*, and *ApoE* (Fig. 2C). Functional  
317 enrichment analysis (FEA) revealed, that the expression of the L-MSC-produced ligands was  
318 associated with pathways related to angiogenesis, cell migration, adhesion and chemotaxis, and  
319 ECM organization (Supplementary fig. 2B, Supplementary table 7).

320

### 321 **3.3 The transcription profile and signaling activity of *Ly6a*<sup>+</sup> L-MSC change significantly** 322 **during postnatal lung development in response to hyperoxia**

323 Hyperoxia induced an increase in proportion of *Ly6a*<sup>+</sup> stromal cells as determined by scRNA-seq  
324 analysis at P14 (Fig. 1F, Supplementary table 3). This was consistent with increased proportion  
325 of LY6A<sup>+</sup> stromal cells in hyperoxia-exposed lungs at P7 as measured by flow cytometry  
326 (Supplementary fig. 2C-D). In order to identify hyperoxia-induced changes in gene expression  
327 specific to *Ly6a*<sup>+</sup> L-MSCs, we performed a DSA for both, *Ly6a*<sup>+</sup> L-MSC population and non-  
328 progenitor *Ly6a*<sup>-</sup> stromal cells (Supplementary table 8). Hyperoxia-induced expression changes  
329 most distinctive of *Ly6a*<sup>+</sup> L-MSCs are illustrated in Fig. 3A. Exposure to hyperoxia was  
330 associated with *Ly6a*<sup>+</sup> L-MSCs - specific increase in expression of multiple pro-inflammatory  
331 (*Cxcl1*, *Ccl2*), as well as pro-fibrotic and anti-angiogenic (*Timp1*, *Serpina3n*) genes (Fig. 3A,  
332 Supplementary table 8). GSEA of hyperoxia-induced changes in gene expression revealed an  
333 activation in inflammatory pathways, as well as decrease in pathways associated with arterial

334 development and morphogenesis (Fig. 3B, Supplementary table 9). When inspecting pathways  
335 altered by hyperoxia exclusively in *Ly6a*<sup>+</sup>, but not *Ly6a*<sup>-</sup> stromal cells, activation of cytokine and  
336 chemokine signaling, cell cycle regulation, and senescence were most noticeable (Supplementary  
337 fig. 2E, Supplementary table 9).

338 To further understand the faith of *Ly6a*<sup>+</sup> L-MSCs in hyperoxia-induced injury, we  
339 performed a cell communication analysis using the NicheNet tool, inferring hyperoxia-induced  
340 cellular communications[23,28] (Fig. 3C, Supplementary fig. 6-7, Supplementary table 10).  
341 *Ly6a*<sup>+</sup> L-MSCs in hyperoxia-exposed lungs received signals from several cell populations,  
342 including immune cells, capillary and arterial endothelial cells, mesothelial cells and *Col13a1*<sup>+</sup>  
343 fibroblasts (Fig. 3C). Further, we inferred genes in *Ly6a*<sup>+</sup> L-MSCs most likely to be targeted by  
344 the received signals (Fig. 3D). Multiple ligands, such as *ApoE*, *Il1a*, *Ifng* and *Mmp9* were  
345 predicted to target the expression of pro-inflammatory, pro-fibrotic and anti-angiogenic genes  
346 discussed above, including *Timp1*, *Cxcl1* and *Icam1* (Fig. 3D). Expression of these target genes  
347 was elevated in *Ly6a*<sup>+</sup> L-MSCs by hyperoxia exposure (Fig. 3A). Finally, ligands produced by  
348 *Ly6a*<sup>+</sup> L-MSCs affected multiple cell populations, including alveolar macrophages, ciliated and  
349 AT2 cells, capillary and vein endothelium and other stromal populations. Among the most  
350 broadly acting ligands produced by *Ly6a*<sup>+</sup> L-MSCs were *Bmp4*, *Bmp5*, *Col4a1* and *Tnc* (Fig.  
351 3A). Inferred target genes in receiving cells targeted by majority of these ligands included  
352 *Ccnd1*, *Cdkn1a*, *Icam1* and *Hmox1* (Fig. 3E). According to FEA, expression of the L-MSC-  
353 produced ligands were associated with pathways related to vessel morphogenesis, epithelial cell  
354 proliferation, cell chemotaxis, and immune homeostasis and response (Supplementary fig. 2F,  
355 Supplementary table 11).

356

### 357 **3.4 Murine LY6A<sup>+</sup> L-MSCs localize to perivascular regions of the developing lung**

358 Next, we aimed to localize the *Ly6a*<sup>+</sup> L-MSCs in the developing lung using FISH. L-MSCs were  
359 identified as *Ly6a*<sup>+</sup>/*Col14a1*<sup>+</sup> cells. L-MSCs in both, normally and aberrantly-developing lungs  
360 localized to perivascular regions of large vessels with more double-positive cells observed in  
361 hyperoxia-exposed lungs (Fig. 4A).

362 Additionally, we aimed to validate some of the novel normoxic and hyperoxic L-MSC  
363 markers as suggested by scRNA-seq analysis (Fig. 1C, Fig. 3A). *Ly6a*<sup>+</sup> L-MSCs were co-stained  
364 for the hyperoxia-associated markers *Timp1* and *Serpina3n* (Fig. 4B and 4C, respectively). In  
365 both instances triple-positive cells were observed in the regions adjacent to large vessels  
366 (highlighted by white squares in low-magnification panels). These cells were not only more  
367 abundant in the lungs from BPD mice, but the expression levels of both, *Timp1* and *Serpina3n*  
368 were increased in the diseased lungs (see higher-magnification panels Fig. 4B-C).

369

### 370 **3.5 Hyperoxia exposure does not impact clonal or differentiation potential of LY6A<sup>+</sup> L-** 371 **MSCs**

372 In order to verify their progenitor cell-like properties, we isolated and studied LY6A<sup>+</sup> L-MSCs  
373 from healthy and hyperoxia-exposed developing mouse pups. An arrest in lung development was  
374 induced by exposing newborn mouse pups to normobaric hyperoxia (85% O<sub>2</sub>) (Fig. 5A). CD31<sup>-</sup>  
375 /CD45<sup>-</sup>/EpCAM<sup>-</sup>/LY6A<sup>+</sup> L-MSCs were isolated from seven days-old healthy (21% O<sub>2</sub>-exposed)  
376 or diseased (85% O<sub>2</sub>-exposed) mouse pups (Fig. 5B) and examined for the hallmarks of the MSC  
377 phenotype *in vitro*. While lungs of hyperoxia-exposed pups consistently yielded higher numbers  
378 of LY6A<sup>+</sup> L-MSCs (Fig. 5B), no differences in the appearance (Fig. 5C), differentiation capacity  
379 (Fig. 5C), expression of surface markers (Fig. 5D), or clonal abilities (Fig. 5E) were observed  
380 between the cells isolated from healthy and diseased animals. LY6A<sup>+</sup> L-MSCs isolated from  
381 both healthy and hyperoxia-exposed mice had a fibroblast-like appearance and expressed  
382 classical markers of MSCs *in vitro* (Fig. 5C-D). In order to investigate their differentiation  
383 capacity, LY6A<sup>+</sup> L-MSCs were induced to differentiate along the osteogenic, chondrogenic, and  
384 adipogenic lineages. Both normoxia and hyperoxia-derived LY6A<sup>+</sup> L-MSCs produced  
385 osteogenic and chondrogenic matrix (Fig. 5C). However, only a single sample of normoxia-  
386 derived LY6A<sup>+</sup> L-MSCs produced a small number of adipocytes, and no lipogenic  
387 differentiation was observed in hyperoxia-derived LY6A<sup>+</sup> L-MSCs (data not shown). Postnatal  
388 hyperoxia exposure had no effect on colony-forming capacity of LY6A<sup>+</sup> L-MSCs as assessed by  
389 single-cell plating colony-forming assay. Both normoxia and hyperoxia-derived LY6A<sup>+</sup> L-MSCs  
390 produced colonies of various sizes. While larger colonies consisted of fibroblast-like spindle-  
391 shaped cells, smaller colonies were formed by cells with a large cytoplasm (Fig. 5E).

392 Inconsistent differentiation capacity and colony formation might suggest a heterogeneous nature  
393 of the LY6A<sup>+</sup> L-MSCs population.

394

### 395 **3.6 Cell culture alters the gene expression profile of LY6A<sup>+</sup> L-MSCs**

396 For therapeutic applications, MSCs are typically culture expanded, then frozen, over the short-,  
397 or long-term and thawed prior to administration. These various steps may alter the properties of  
398 the cell product. In order to understand changes in the L-MSCs expression profile induced by  
399 storage and culture, we performed a scRNA-seq analysis of cultured LY6A<sup>+</sup> and LY6A<sup>-</sup> lung  
400 stromal cells isolated from seven days-old healthy (21% O<sub>2</sub>-exposed) or diseased (85% O<sub>2</sub>-  
401 exposed) mouse pups (Fig. 6A, Supplementary fig. 2C-D). We sequenced over 15,000 cultured  
402 CD31<sup>-</sup>/CD45<sup>-</sup>/EpCAM<sup>-</sup>/LY6A<sup>-</sup> and CD31<sup>-</sup>/CD45<sup>-</sup>/EpCAM<sup>-</sup>/LY6A<sup>+</sup> cells and identified four  
403 distinct clusters (Fig. 6A-C, Supplementary tables 12-13). While normoxia and hyperoxia-  
404 derived LY6A<sup>-</sup> stromal cells contributed to all four clusters, very few LY6A<sup>+</sup> cells could be  
405 found in clusters 2 and 3 (Fig. 6B). The presence of distinct clusters within the L-MSCs  
406 population is consistent with the heterogeneous phenotype of cultured L-MSCs described above  
407 (Fig. 5E). In line with this finding, the highest levels of routine MSC markers, such as *Thy1*,  
408 *Eng*, *Alcam* or *Mcam*, were found in the largest cluster 0, while very little expression was seen in  
409 the two smallest clusters (Fig. 6D). While still expressing routine MSC markers to some level,  
410 cluster 1 was characterized by its distinct expression of *Cck*, previously found to attenuate *p53*-  
411 mediated apoptosis in lung cancer [31] (Figure 3A-C). Cluster 2 was distinguished by the  
412 expression of pro-adipogenic markers, such as *Igfbp2* and *Col4a1*, as well as markers of  
413 myofibroblasts (*Des*) and alveolar epithelium (*Krt8* and *Prnp2*) (Fig. 6C, Supplementary table  
414 13). Cluster 3 was characterized by the expression of multiple osteogenic markers, including  
415 *Cryab*, *Postn* and *Ngfr*. Interestingly, the expression of both *Postn*, as well as another cluster 3  
416 marker *Coll8a1*, was previously reported in BPD patients and hyperoxia-exposed developing  
417 mice [32,33].

418 Next, we aimed to identify the best markers for cultured L-MSCs (Supplementary tables  
419 14-18). We compared the gene expression profiles of LY6A<sup>+</sup> and LY6A<sup>-</sup> stromal cells  
420 (Supplementary tables 15-18) and identified differentially expressed genes between normoxia-  
421 and hyperoxia-derived subsets of these populations (Supplementary tables 17-18). In comparison

422 to LY6A<sup>-</sup> cells, LY6A<sup>+</sup> cells were characterized by high expression of *Actg2*, *Col1a2*, *Serpinf1*,  
423 *Prrx1* and *Lxn*, and by low expression of smooth muscle cell (SMC) marker *Tagln2*[34], alveolar  
424 progenitor marker *Tm4sf1*[35], and *Prdx6* (Fig. 6E, Supplementary tables 15-16). From these  
425 markers hyperoxia exposure further specifically increased the expression of *Actg2*, and decreased  
426 the expression of *Tagln2*, *Tm4sf1* and *Prdx6* in LY6A<sup>+</sup> cells. Hyperoxic LY6A<sup>+</sup> cells were  
427 additionally distinguished by expression of *Ptn*, *Adamts5*, *Rbp*, and *Col3a1* (Fig. 6E,  
428 Supplementary table 17). Expression of *Prrx1* and *Serpinf1* is known to favour an osteogenic  
429 phenotype, and *Serpinf1* is known to inhibit adipogenesis[36,37].

430 In order to identify L-MSCs expression patterns maintained after cell culture and storage,  
431 we next compared expression of the most promising markers of *Ly6a*<sup>+</sup> L-MSCs in both, *in situ*  
432 and *in vitro* datasets from cells isolated at P7 (Supplementary fig. 2G-H). This analysis revealed  
433 that a large portion of the expression profile characteristic for *Ly6a*<sup>+</sup> L-MSCs *in situ*  
434 (Supplementary fig. 2G-H) is lost when cells are frozen and cultured, including the expression of  
435 promising markers, such as *Lum*, *Ptn*, *Dcn*, or *Pi16* (Supplementary fig. 2H). Furthermore, while  
436 the expression pattern of some markers, such as *Serpina3n* or *C3* persisted in cultured cells, the  
437 portion of the cells expressing the gene was diminished (Fig. 7A-B). The most suitable *in situ* or  
438 *in vitro*-specific identifying markers of *Ly6a*<sup>+</sup> L-MSCs are depicted in Fig. 4A-B. Among the  
439 most stable markers of *Ly6a*<sup>+</sup> L-MSCs, resistant to changes induced by culture, were *Serpinf1*  
440 and *Postn* (Fig. 7A-B, Supplementary fig. 2G-H). In order to confirm the viability of *Serpinf1* as  
441 potential novel marker for L-MSCs we performed FISH in developing lungs at P14. Triple-  
442 positive cells could be found in lungs of both, normoxic and hyperoxic mice (Fig. 7C). No  
443 differences were apparent in *Serpinf1* expression intensity between the two groups.

444 Finally, new expression patterns arose particularly in hyperoxia-derived *Ly6a*<sup>+</sup> L-MSCs  
445 after cell culture. While a high *Ptn*, *Lum*, *Dcn*, *Col3a2* and *Coll4a1* expression was initially  
446 characteristic of both, hyperoxia and normoxia-derived *Ly6a*<sup>+</sup> L-MSCs, in cultured L-MSCs this  
447 was true only for the hyperoxia-derived *Ly6a*<sup>+</sup> L-MSCs (Supplementary fig. 2G-H). This  
448 expression pattern denotes, that not only does the L-MSC transcriptome change in culture, but  
449 that the cells isolated from lungs of diseased mice tend to retain their expression profile and,  
450 potentially, progenitor-like nature longer.

451

## 452 **DISCUSSION**

453 Our current knowledge regarding the identity and properties of tissue resident MSCs remains  
454 limited. Most studies analyse L-MSCs in culture after isolation with one, or several MSC  
455 markers. However, no explicit rules regarding which markers represent the L-MSC population  
456 the best exist to date. The progenitor-like characteristics of these cells have been established in  
457 culture [13,14], but it is not yet known why L-MSCs fail to prevent the lung injury or restore  
458 damage in the lung. While L-MSCs were previously found in bronchoalveolar lavage of BPD  
459 patients [50], it is not known whether this is due to increased apoptosis and subsequent shedding  
460 from the lung or is a sign of activation and proliferation of L-MSC and hence of increased  
461 numbers in BPD patients. Here, we provide an extensive scRNA-seq based analysis of L-MSCs  
462 in developing mouse lung, as well as in culture. We characterize the changes in transcriptomic  
463 profile induced in L-MSCs by developmental age, exposure to hyperoxia, and culture. Our study  
464 further provides an insight into communication between L-MSCs and other cell populations in  
465 the normally and abnormally developing lung. Finally, we propose novel markers for  
466 identification of L-MSCs in the developing lung.

467 The use of omics approaches to study tissue-specific MSCs *in vivo* has been previously  
468 proposed [38]. In the study presented here, we utilize scRNA-seq to study L-MSCs immediately  
469 after isolation (*in situ*) without confounding procedures, such as FACS, cell culture and storage,  
470 and hence preserve the *in vivo* activation status of the different lung populations as much as  
471 possible. We selected *Ly6a* to identify L-MSCs for 2 reasons: i) *Ly6a* is one of the most  
472 commonly used L-MSC markers and its expression has been shown in specific progenitor-like  
473 populations, ii) *Ly6a* was the only known MSC marker forming a visible subcluster within the  
474 lung mesenchyme of early postnatal mouse pups. We identified novel markers of L-MSCs,  
475 including *Lum*, *Serpinf1*, and *Dcn*. Next, we showed how the L-MSC's transcriptome changes  
476 during the course of normal lung development and in hyperoxia, and explored the  
477 communication between L-MSCs and other lung cell populations.

478 Hyperoxia-exposure, used as a model for BPD, was associated in *Ly6a*<sup>+</sup> L-MSCs with  
479 increased expression of multiple pro-inflammatory (*Cxcl1*, *Ccl2*), pro-fibrotic and anti-  
480 angiogenic (*Timp1*, *Serpina3n*) genes. Similarly, increased expression of both, *Timp1* and *Ccl2*  
481 was previously reported in hyperoxia-exposed rodents [39,40], and in plasma [41] or tracheal



482 aspirates (TA) [42] of BPD patients. *Timp1* expression was further increased in fibrotic foci in  
483 chronic BPD [43] and in the lungs of ventilated newborns [44]. GSEA further confirmed the  
484 activation of inflammatory and pro-fibrotic pathways, and a decrease in sprouting angiogenesis  
485 and vessel morphogenesis in the hyperoxia-exposed developing lungs. To further explore the  
486 role L-MSCs play in cell signaling during the development, we performed a cell communication  
487 inference analysis. L-MSCs in healthy developing lungs received ligands secreted mainly from  
488 endothelial, immune and other stromal cells. L-MSCs signalled back to the majority of lung cell  
489 populations with a selected set of ligands (Fig. 2). Upon hyperoxia exposure, L-MSCs received  
490 ligands primarily from immune and endothelial cells, including *Il1a*, *Mmp9*, *Ifng*, and *Fasl* (Fig.  
491 3). Interestingly, multiple ligands received by L-MSCs were predicted to target the expression of  
492 pro-inflammatory, pro-fibrotic and anti-angiogenic genes increased in hyperoxia-exposed L-  
493 MSCs, such as *Timp1*, *Cxcl1* and *Icam1*. IFN $\gamma$  and MMP9, which target the expression of both  
494 *Timp1* and *Cxcl1*, were previously implicated in development of alveolar hypoplasia [45] and an  
495 increased expression of IFN $\gamma$  was reported in TA of BPD patients [27,46]. Development of BPD  
496 was also associated with increased TA and plasma protein levels of ICAM1 [47,48]. IL1A was  
497 also shown to induce an inflammatory phenotype in lung fibroblasts [49]. Additionally, *Fasl*<sup>+</sup>  
498 immune cells were shown to induce fibroblast cell death [50,51], and its overexpression was  
499 associated with alveolar apoptosis and disturbed alveolar and vascular development [52].

500 Next, we investigated how the L-MSCs' transcriptome changed due to culture and  
501 storage, both necessary steps for the preparation of a cell therapeutic product. ScRNA-seq  
502 analysis revealed, that following isolation, storage and culture, most L-MSCs retain the  
503 expression of MSC markers, including *Ly6a*<sup>+</sup>. Cultured L-MSCs showed moderate ability to  
504 differentiate into chondrocytes and osteoblasts. However, we observed only one instance of  
505 successful differentiation along the adipogenic lineage, consistent with previous studies of L-  
506 MSCs in developing rats [13]. Inconsistent differentiation capacity could be attributed to  
507 heterogeneity within the L-MSC population as indicated by the variable size and morphology of  
508 L-MSC-derived colonies (Fig. 5). Importantly, such heterogeneity could indicate the existence of  
509 L-MSCs with varying progenitor-like capabilities, most likely impacting their therapeutic  
510 efficacy. Further, more detailed characterization of different L-MSCs subpopulations might be  
511 necessary in order to prepare a superior therapeutic product. ScRNA-seq revealed considerable  
512 changes in the transcriptome of L-MSCs in culture, implying that the cells studied and

513 maintained *in vitro* for the purposes of therapeutic interventions are appreciably altered  
514 compared to L-MSCs *in situ* (Fig. 6). Interestingly, we observed that the culture-induced  
515 transcription changes are less pronounced in L-MSCs derived from hyperoxia-exposed animals.  
516 This might suggest that hyperoxia primes L-MSCs to maintain certain characteristics, potentially  
517 in an attempt to trigger a repair mechanism. While the organism's own resident L-MSCs fail to  
518 prevent the hyperoxia-induced lung damage, a therapeutic use of injury-primed L-MSCs might  
519 be more beneficial than L-MSCs from healthy individuals. Interestingly, tissue origin and  
520 microenvironment were shown to significantly impact the behaviour and therapeutic efficacy of  
521 MSCs [53,54]. Moreover, conditioned media from BM-MSCs exposed *ex vivo* to hyperoxia  
522 exhibited superior therapeutic effects in the hyperoxia-induced rat BPD model when compared to  
523 media from BM-MSCs which were not pre-conditioned [55].

524 The localization of L-MSCs in the developing lungs has not yet been described. Here, we  
525 localized the L-MSC cells in the perivascular regions of both, healthy and diseased developing  
526 lungs by FISH. The *Ly6a*<sup>+</sup> L-MSCs in the hyperoxia-exposed lungs co-expressed *Timp1* and  
527 *Serpina3e*, confirming the results of scRNA-seq analysis. Finally, as *Ly6a* is not expressed in  
528 human tissues, we aimed to identify additional markers to label L-MSCs, both *in situ* and *in*  
529 *vitro*. *Lum*, identified as marker of L-MSCs *in situ*, is known to be produced by MSCs. Within  
530 the lung, its expression was localized to peripheral lung and vessel walls [56]. While scRNA-  
531 seq revealed *Lum* as a promising L-MSCs marker *in situ*, its expression in culture was preserved  
532 only in a small fraction of L-MSCs isolated from hyperoxia-exposed animals (Fig. 7A). In  
533 comparison, the expression of *Serpinf1* was well preserved *in vitro*, with the expression slightly  
534 increased in hyperoxic cells. Interestingly, *Serpinf1* expression was previously reported to be  
535 increased in hyperoxia-exposed newborn mice and *Serpinf1*<sup>-/-</sup> animals were protected from  
536 hyperoxia-induced lung injury [57]. *Serpinf1* is also known as an anti-angiogenic and anti-  
537 migratory marker associated with aging MSCs [57,58]. *In situ*, *Serpinf1* colocalized well with  
538 *Ly6a*<sup>+</sup>/*Coll4a1*<sup>+</sup> cells in both healthy and diseased lungs, suggesting *Serpinf1* as promising new  
539 marker for L-MSCs (Fig. 7).

540 To our knowledge, this is the first detailed report studying the characteristics and  
541 behaviour of L-MSC *in situ* and *in vitro*, during both health and disease. We unravelled the  
542 transcriptome and cellular communication of this lung resident cell population by scRNA-seq in



543 order to mechanistically understand its endogenous repair capabilities, as well as its potential use  
544 as an exogenous cell therapeutic product. In addition, we have established several markers that  
545 can be used to identify L-MSc *in vitro* and *in vivo*, both in healthy and diseased lungs.  
546 Additional studies will be needed to further unravel the heterogeneity of this population, as well  
547 as their therapeutic capabilities.

548

## 549 **ACKNOWLEDGMENTS**

550 The authors acknowledge Prof. Zev Gartner (University of California, San Francisco) for kindly  
551 providing barcodes for multiplex labelling and Prof. Dr. Gloria Pryhuber from LungMAP  
552 Human Tissue Core, Biorepository for Investigation of Neonatal Diseases of Lung-Normal  
553 (BRINDL-NL) for kindly providing the human tissue material. This study was supported by the  
554 Canadian Institutes of Health Research (CIHR), the German Research Foundation (Deutsche  
555 Forschungsgemeinschaft), the Frederick Banting and Charles Best Doctoral Scholarship, the  
556 Finnish Foundation for Pediatric Research, the Finnish Sigrid Juselius Foundation, the Canadian  
557 Lung Association - Breathing as One, and the Molly Towel Perinatal Research Foundation.

558

## 559 **DISCLOSURE OF POTENTIAL CONFLICT OF INTERESTS**

560 The authors declare no conflicts of interest, financially or otherwise.

561

562

563

564 **REFERENCES**

- 565 1 Warburton D. Overview of Lung Development in the Newborn Human. *Neonatology*  
566 2017;111:398–401.
- 567 2 Thébaud B, Goss KN, Laughon M, et al. Bronchopulmonary dysplasia. *Nat Rev Dis Primers*  
568 2019;5:78.
- 569 3 Wong PM, Lees AN, Louw J, et al. Emphysema in young adult survivors of moderate-to-severe  
570 bronchopulmonary dysplasia. *European Respiratory Journal* 2008;32:321–328.
- 571 4 Fawke J, Lum S, Kirkby J, et al. Lung Function and Respiratory Symptoms at 11 Years in Children  
572 Born Extremely Preterm: The EPICure Study. *Am J Respir Crit Care Med* 2010;182:237–245.
- 573 5 O'Reilly M, Möbius MA, Vadivel A, et al. Late Rescue Therapy with Cord-Derived Mesenchymal  
574 Stromal Cells for Established Lung Injury in Experimental Bronchopulmonary Dysplasia. *Stem Cells and*  
575 *Development* 2020;29:364–371.
- 576 6 van Haaften T, Byrne R, Bonnet S, et al. Airway Delivery of Mesenchymal Stem Cells Prevents  
577 Arrested Alveolar Growth in Neonatal Lung Injury in Rats. *Am J Respir Crit Care Med* 2009;180:1131–  
578 1142.
- 579 7 Sutsko RP, Young KC, Ribeiro A, et al. Long-term reparative effects of mesenchymal stem cell  
580 therapy following neonatal hyperoxia-induced lung injury. *Pediatr Res* 2013;73:46–53.
- 581 8 Pierro M, Ionescu L, Montemurro T, et al. Short-term, long-term and paracrine effect of human  
582 umbilical cord-derived stem cells in lung injury prevention and repair in experimental  
583 bronchopulmonary dysplasia. *Thorax* 2013;68:475–484.
- 584 9 Augustine S, Cheng W, Avey MT, et al. Are all stem cells equal? Systematic review, evidence  
585 map, and meta-analyses of preclinical stem cell-based therapies for bronchopulmonary dysplasia. *STEM*  
586 *CELLS Translational Medicine* 2020;9:158–168.
- 587 10 Aslam M, Baveja R, Liang OD, et al. Bone Marrow Stromal Cells Attenuate Lung Injury in a  
588 Murine Model of Neonatal Chronic Lung Disease. *Am J Respir Crit Care Med* 2009;180:1122–1130.
- 589 11 Collins JJP, Thébaud B. Progenitor cells of the distal lung and their potential role in neonatal lung  
590 disease: Progenitor Cells of The Distal Lung. *Birth Defects Research Part A: Clinical and Molecular*  
591 *Teratology* 2014;100:217–226.
- 592 12 Ushakumary MG, Riccetti M, Perl AT. Resident interstitial lung fibroblasts and their role in  
593 alveolar stem cell niche development, homeostasis, injury, and regeneration. *STEM CELLS Transl Med*  
594 2021:sctm.20-0526.
- 595 13 Collins JJP, Lithopoulos MA, dos Santos CC, et al. Impaired Angiogenic Supportive Capacity and  
596 Altered Gene Expression Profile of Resident CD146<sup>+</sup> Mesenchymal Stromal Cells Isolated from  
597 Hyperoxia-Injured Neonatal Rat Lungs. *Stem Cells and Development* 2018;27:1109–1124.
- 598 14 Lama VN, Smith L, Badri L, et al. Evidence for tissue-resident mesenchymal stem cells in human  
599 adult lung from studies of transplanted allografts. *J Clin Invest* 2007;117:989–996.

- 600 15 Rolandsson Enes S, Andersson Sjöland A, Skog I, et al. MSC from fetal and adult lungs possess  
601 lung-specific properties compared to bone marrow-derived MSC. *Sci Rep* 2016;6:29160.
- 602 16 Deng M, Li J, Gan Y, et al. Changes in the number of CD31<sup>+</sup>;CD45<sup>+</sup>;Sca-1<sup>+</sup> cells and Shh  
603 signaling pathway involvement in the lungs of mice with emphysema and relevant effects of acute  
604 adenovirus infection. *COPD* 2017;Volume 12:861–872.
- 605 17 Gong X, Sun Z, Cui D, et al. Isolation and characterization of lung resident mesenchymal stem  
606 cells capable of differentiating into alveolar epithelial type II cells: Isolation and characterization of LR-  
607 MSCs. *Cell Biol Int* 2014;38:405–411.
- 608 18 Shi C, Cao X, Chen X, et al. Intracellular surface-enhanced Raman scattering probes based on TAT  
609 peptide-conjugated Au nanostars for distinguishing the differentiation of lung resident mesenchymal  
610 stem cells. *Biomaterials* 2015;58:10–25.
- 611 19 McQualter JL, Brouard N, Williams B, et al. Endogenous Fibroblastic Progenitor Cells in the Adult  
612 Mouse Lung Are Highly Enriched in the Sca-1 Positive Cell Fraction. *Stem Cells* 2009;27:623–633.
- 613 20 McQualter JL, Yuen K, Williams B, et al. Evidence of an epithelial stem/progenitor cell hierarchy  
614 in the adult mouse lung. *Proceedings of the National Academy of Sciences* 2010;107:1414–1419.
- 615 21 Salaets T, Gie A, Jimenez J, et al. Local pulmonary drug delivery in the preterm rabbit: feasibility  
616 and efficacy of daily intratracheal injections. *American Journal of Physiology-Lung Cellular and Molecular  
617 Physiology* 2019;316:L589–L597.
- 618 22 McGinnis CS, Patterson DM, Winkler J, et al. MULTI-seq: sample multiplexing for single-cell RNA  
619 sequencing using lipid-tagged indices. *Nat Methods* 2019;16:619–626.
- 620 23 Hurskainen M, Mižíková I, Cook DP, et al. Single cell transcriptomic analysis of murine lung  
621 development on hyperoxia-induced damage. *Nat Commun* 2021;12:1565.
- 622 24 Butler A, Hoffman P, Smibert P, et al. Integrating single-cell transcriptomic data across different  
623 conditions, technologies, and species. *Nat Biotechnol* 2018;36:411–420.
- 624 25 Hafemeister C, Satija R. Normalization and variance stabilization of single-cell RNA-seq data  
625 using regularized negative binomial regression. *Genome Biol* 2019;20:296.
- 626 26 Liberzon A, Birger C, Thorvaldsdóttir H, et al. The Molecular Signatures Database Hallmark Gene  
627 Set Collection. *Cell Systems* 2015;1:417–425.
- 628 27 Aghai ZH, Saslow JG, Mody K, et al. IFN- $\gamma$  and IP-10 in tracheal aspirates from premature infants:  
629 Relationship with bronchopulmonary dysplasia. *Pediatr Pulmonol* 2013;48:8–13.
- 630 28 Browaeys R, Saelens W, Saeys Y. NicheNet: modeling intercellular communication by linking  
631 ligands to target genes. *Nat Methods* 2020;17:159–162.
- 632 29 Malinowski M, Pietraszek K, Perreau C, et al. Effect of Lumican on the Migration of Human  
633 Mesenchymal Stem Cells and Endothelial Progenitor Cells: Involvement of Matrix Metalloproteinase-14.  
634 *PLoS ONE* 2012;7:e50709.

- 635 30 Li L-F, Chu P-H, Hung C-Y, et al. Lumican Regulates Ventilation-Induced Epithelial-Mesenchymal  
636 Transition Through Extracellular Signal-Regulated Kinase Pathway. *Chest* 2013;143:1252–1260.
- 637 31 Han Y, Su C, Yu D, et al. Cholecystokinin attenuates radiation-induced lung cancer cell apoptosis  
638 by modulating p53 gene transcription. *Am J Transl Res* 2017;9:638–646.
- 639 32 Bozyk PD, Bentley JK, Popova AP, et al. Neonatal Periostin Knockout Mice Are Protected from  
640 Hyperoxia-Induced Alveolar Simplification. *PLoS ONE* 2012;7:e31336.
- 641 33 Mohamed WAW, Niyazy WH, Mahfouz AA. Angiopoietin-1 and Endostatin Levels in Cord Plasma  
642 Predict the Development of Bronchopulmonary Dysplasia in Preterm Infants. *Journal of Tropical*  
643 *Pediatrics* 2011;57:385–388.
- 644 34 Shudo Y, Cohen JE, Goldstone AB, et al. Isolation and trans-differentiation of mesenchymal  
645 stromal cells into smooth muscle cells: Utility and applicability for cell-sheet engineering. *Cytherapy*  
646 2016;18:510–517.
- 647 35 Zacharias WJ, Frank DB, Zepp JA, et al. Regeneration of the lung alveolus by an evolutionarily  
648 conserved epithelial progenitor. *Nature* 2018;555:251–255.
- 649 36 Yu S, Li P, Li B, et al. RelA promotes proliferation but inhibits osteogenic and chondrogenic  
650 differentiation of mesenchymal stem cells. *FEBS Lett* 2020;594:1368–1378.
- 651 37 Gattu AK, Swenson ES, Iwakiri Y, et al. Determination of mesenchymal stem cell fate by pigment  
652 epithelium-derived factor (PEDF) results in increased adiposity and reduced bone mineral content.  
653 *FASEB j* 2013;27:4384–4394.
- 654 38 Sipp D, Robey PG, Turner L. Clear up this stem-cell mess. *Nature* 2018;561:455–457.
- 655 39 Hosford GE, Fang X, Olson DM. Hyperoxia Decreases Matrix Metalloproteinase-9 and Increases  
656 Tissue Inhibitor of Matrix Metalloproteinase-1 Protein in the Newborn Rat Lung: Association with  
657 Arrested Alveolarization. *Pediatr Res* 2004;56:26–34.
- 658 40 Kumar VHS, Lakshminrusimha S, Kishkurno S, et al. Neonatal hyperoxia increases airway  
659 reactivity and inflammation in adult mice: Neonatal Hyperoxia and AHR in Mice. *Pediatr Pulmonol*  
660 2016;51:1131–1141.
- 661 41 Schulz CG, Sawicki G, Lemke RP, et al. MMP-2 and MMP-9 and Their Tissue Inhibitors in the  
662 Plasma of Preterm and Term Neonates. *Pediatr Res* 2004;55:794–801.
- 663 42 Fulton CT, Cui TX, Goldsmith AM, et al. Gene Expression Signatures Point to a Male Sex-Specific  
664 Lung Mesenchymal Cell PDGF Receptor Signaling Defect in Infants Developing Bronchopulmonary  
665 Dysplasia. *Sci Rep* 2018;8:17070.
- 666 43 Dik WA, de Krijger RR, Bonekamp L, et al. Localization and Potential Role of Matrix  
667 Metalloproteinase-1 and Tissue Inhibitors of Metalloproteinase-1 and -2 in Different Phases of  
668 Bronchopulmonary Dysplasia. *Pediatr Res* 2001;50:761–766.
- 669 44 De Paepe ME, Greco D, Mao Q. Angiogenesis-related gene expression profiling in ventilated  
670 preterm human lungs. *Experimental Lung Research* 2010;36:399–410.

- 671 45 Harijith A, Choo-Wing R, Cataltepe S, et al. A Role for Matrix Metalloproteinase 9 in IFN $\gamma$ -  
672 Mediated Injury in Developing Lungs: Relevance to Bronchopulmonary Dysplasia. *Am J Respir Cell Mol*  
673 *Biol* 2011;44:621–630.
- 674 46 Hikino S, Ohga S, Kinjo T, et al. Tracheal aspirate gene expression in preterm newborns and  
675 development of bronchopulmonary dysplasia: TAF cell gene expression predicting BPD. *Pediatrics*  
676 *International* 2012;54:208–214.
- 677 47 Ballabh P, Kumari J, Krauss AN, et al. Soluble E-Selectin, Soluble L-Selectin and Soluble ICAM-1 in  
678 Bronchopulmonary Dysplasia, and Changes With Dexamethasone. *PEDIATRICS* 2003;111:461–468.
- 679 48 Kojima T, Sasai M, Kobayashi Y. Increased soluble ICAM-1 in tracheal aspirates of infants with  
680 bronchopulmonary dysplasia. *The Lancet* 1993;342:1023–1024.
- 681 49 Suwara MI, Green NJ, Borthwick LA, et al. IL-1 $\alpha$  released from damaged epithelial cells is  
682 sufficient and essential to trigger inflammatory responses in human lung fibroblasts. *Mucosal Immunol*  
683 2014;7:684–693.
- 684 50 Nareznoi D, Konikov-Rozenman J, Petukhov D, et al. Matrix Metalloproteinases Retain Soluble  
685 FasL-mediated Resistance to Cell Death in Fibrotic-Lung Myofibroblasts. *Cells* 2020;9:411.
- 686 51 Predescu SA, Zhang J, Bardita C, et al. Mouse Lung Fibroblast Resistance to Fas-Mediated  
687 Apoptosis Is Dependent on the Baculoviral Inhibitor of Apoptosis Protein 4 and the Cellular FLICE-  
688 Inhibitory Protein. *Front Physiol* 2017;8.
- 689 52 De Paepe ME, Gundavarapu S, Tantravahi U, et al. Fas-Ligand-Induced Apoptosis of Respiratory  
690 Epithelial Cells Causes Disruption of Postcanalicular Alveolar Development. *The American Journal of*  
691 *Pathology* 2008;173:42–56.
- 692 53 Abreu SC, Rolandsson Enes S, Dearborn J, et al. Lung inflammatory environments differentially  
693 alter mesenchymal stromal cell behavior. *American Journal of Physiology-Lung Cellular and Molecular*  
694 *Physiology* 2019;317:L823–L831.
- 695 54 Islam D, Huang Y, Fanelli V, et al. Identification and Modulation of Microenvironment Is Crucial  
696 for Effective Mesenchymal Stromal Cell Therapy in Acute Lung Injury. *Am J Respir Crit Care Med*  
697 2019;199:1214–1224.
- 698 55 Waszak P, Alphonse R, Vadivel A, et al. Preconditioning Enhances the Paracrine Effect of  
699 Mesenchymal Stem Cells in Preventing Oxygen-Induced Neonatal Lung Injury in Rats. *Stem Cells and*  
700 *Development* 2012;21:2789–2797.
- 701 56 Dolhnikoff M, Morin J, Roughley PJ, et al. Expression of Lumican in Human Lungs. *Am J Respir*  
702 *Cell Mol Biol* 1998;19:582–587.
- 703 57 Chetty A, Bennett M, Dang L, et al. Pigment Epithelium–Derived Factor Mediates Impaired Lung  
704 Vascular Development in Neonatal Hyperoxia. *Am J Respir Cell Mol Biol* 2015;52:295–303.
- 705 58 Liang H, Hou H, Yi W, et al. Increased expression of pigment epithelium-derived factor in aged  
706 mesenchymal stem cells impairs their therapeutic efficacy for attenuating myocardial infarction injury $\ddagger$ .  
707 *European Heart Journal* 2013;34:1681–1690.



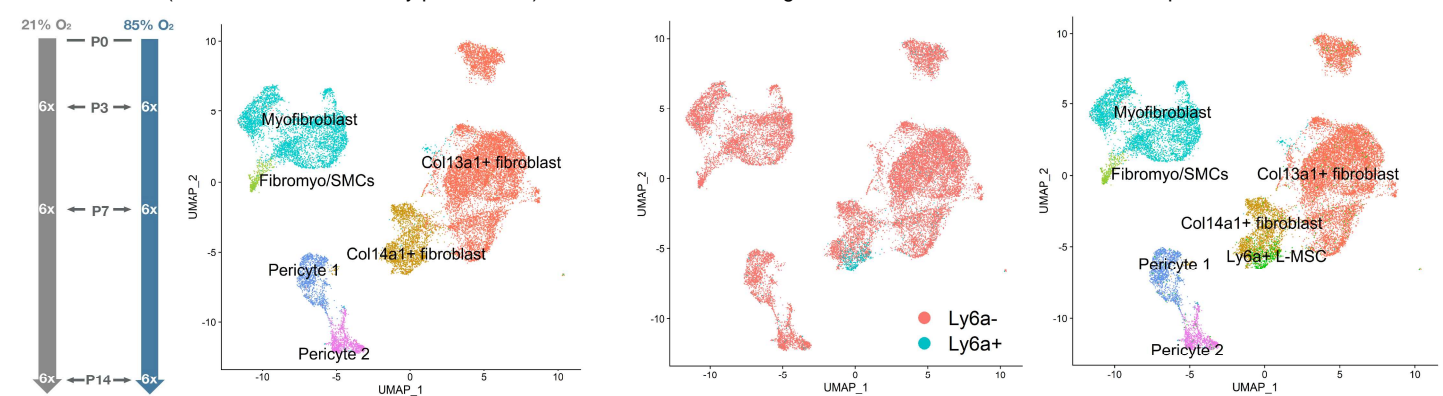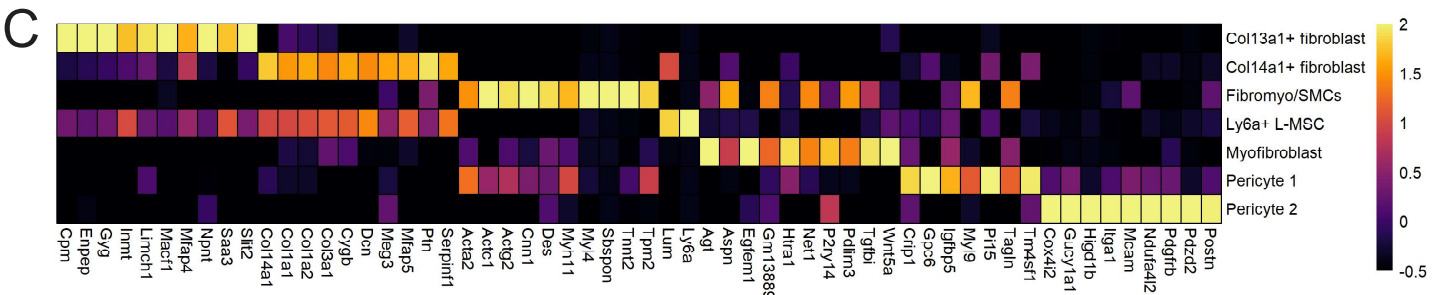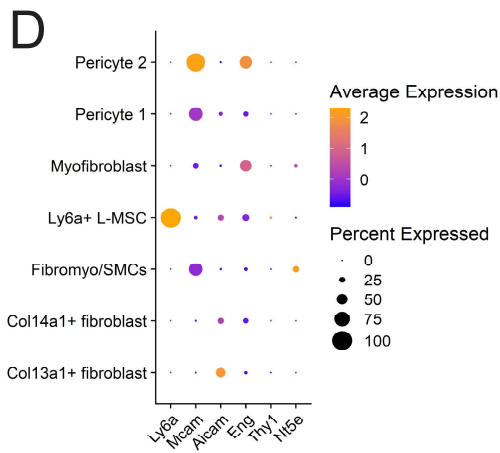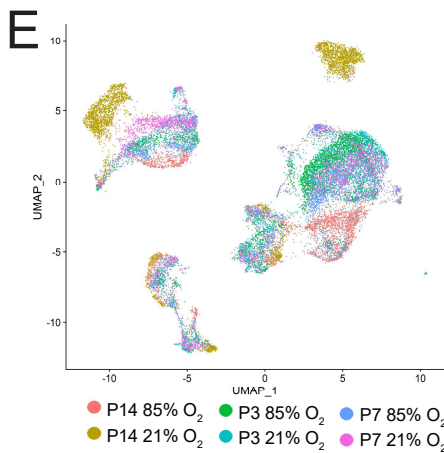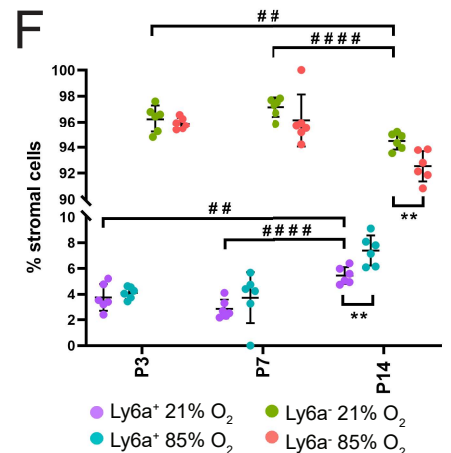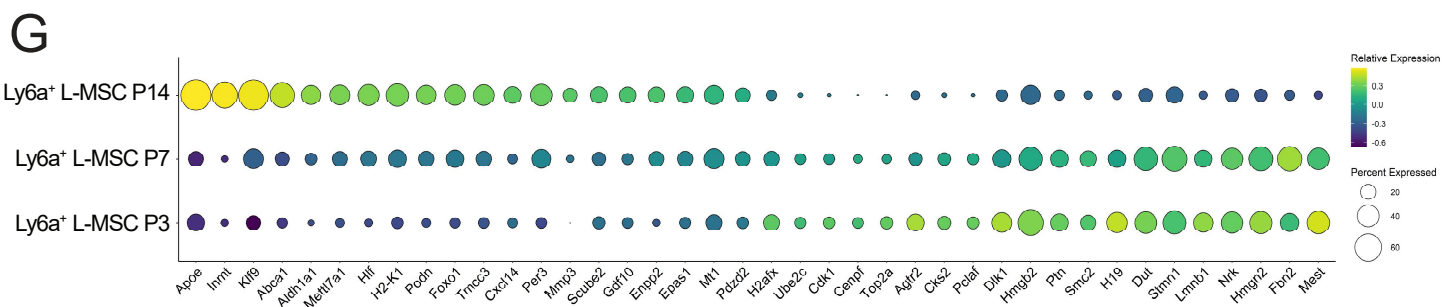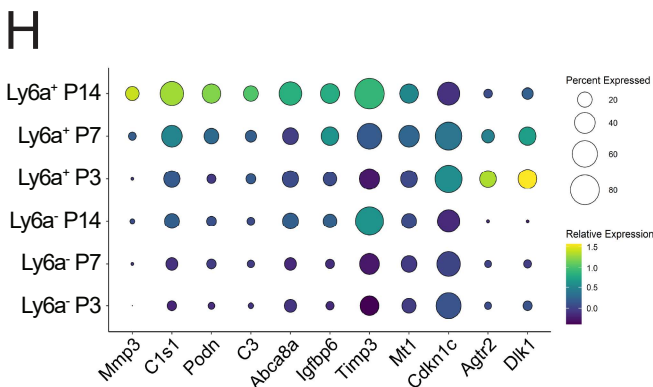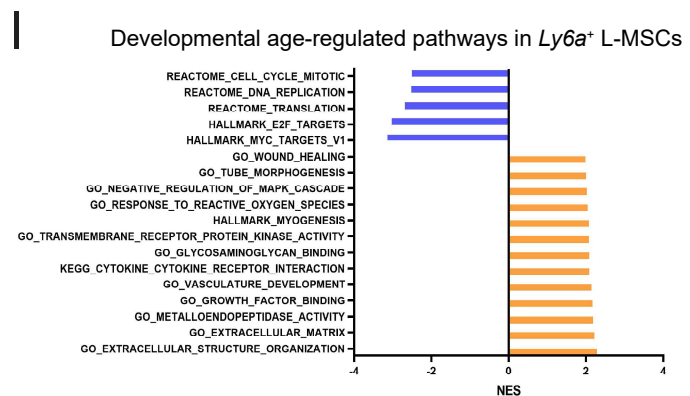

**Figure 1**



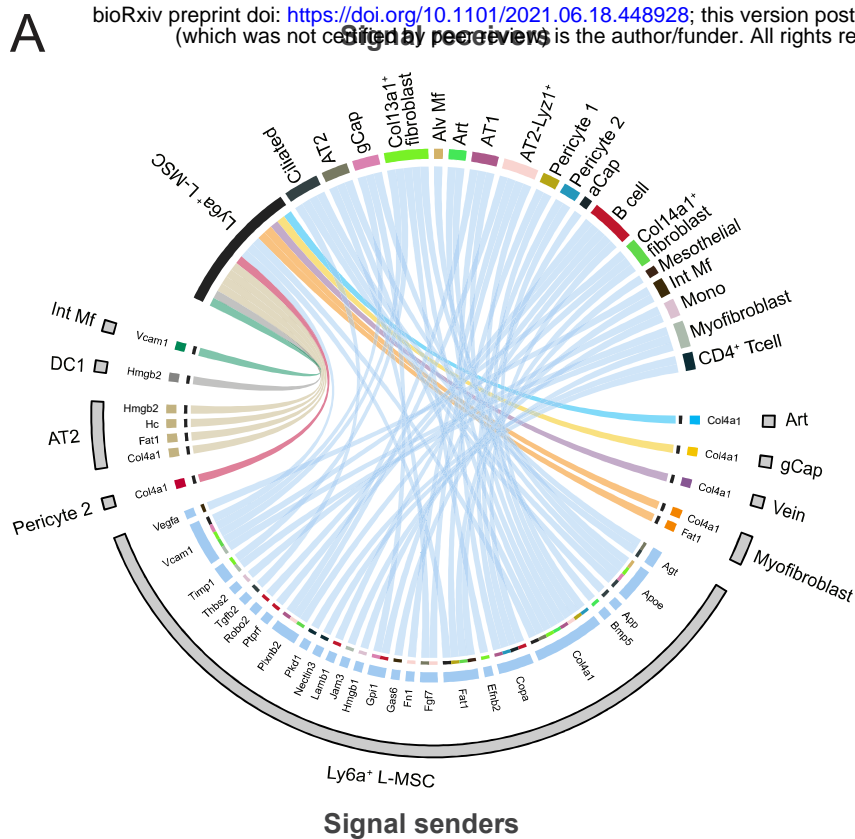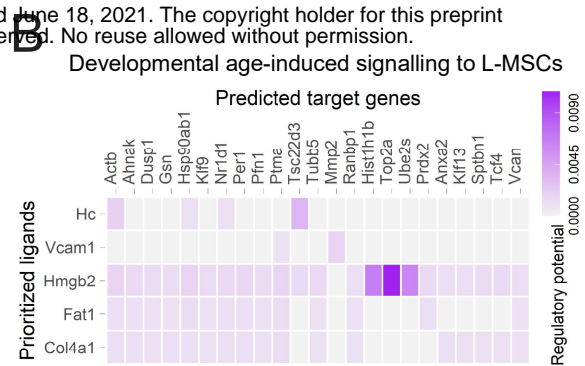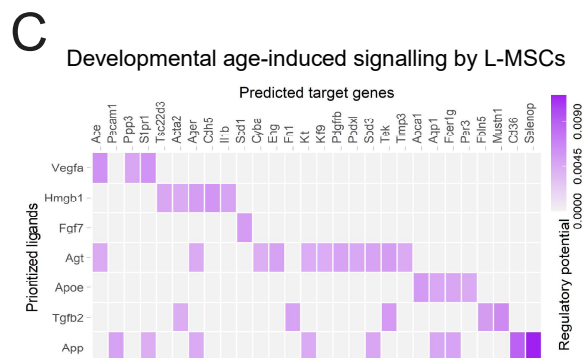

Figure 2



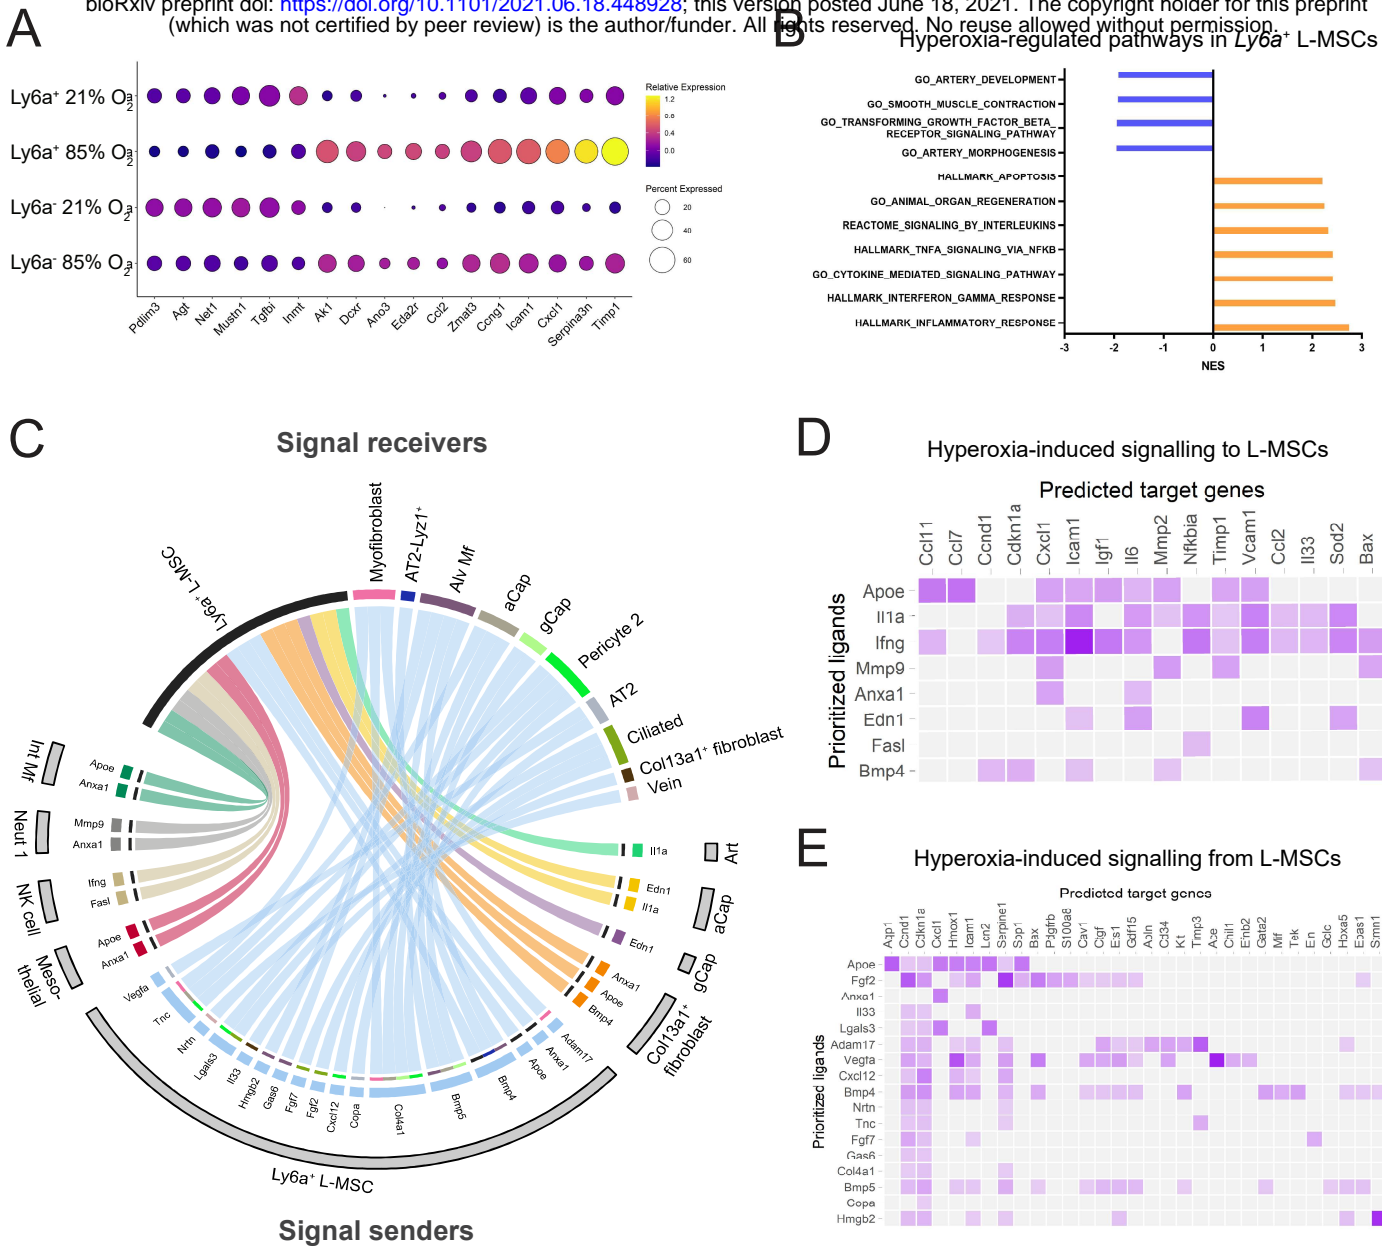

Figure 3

A

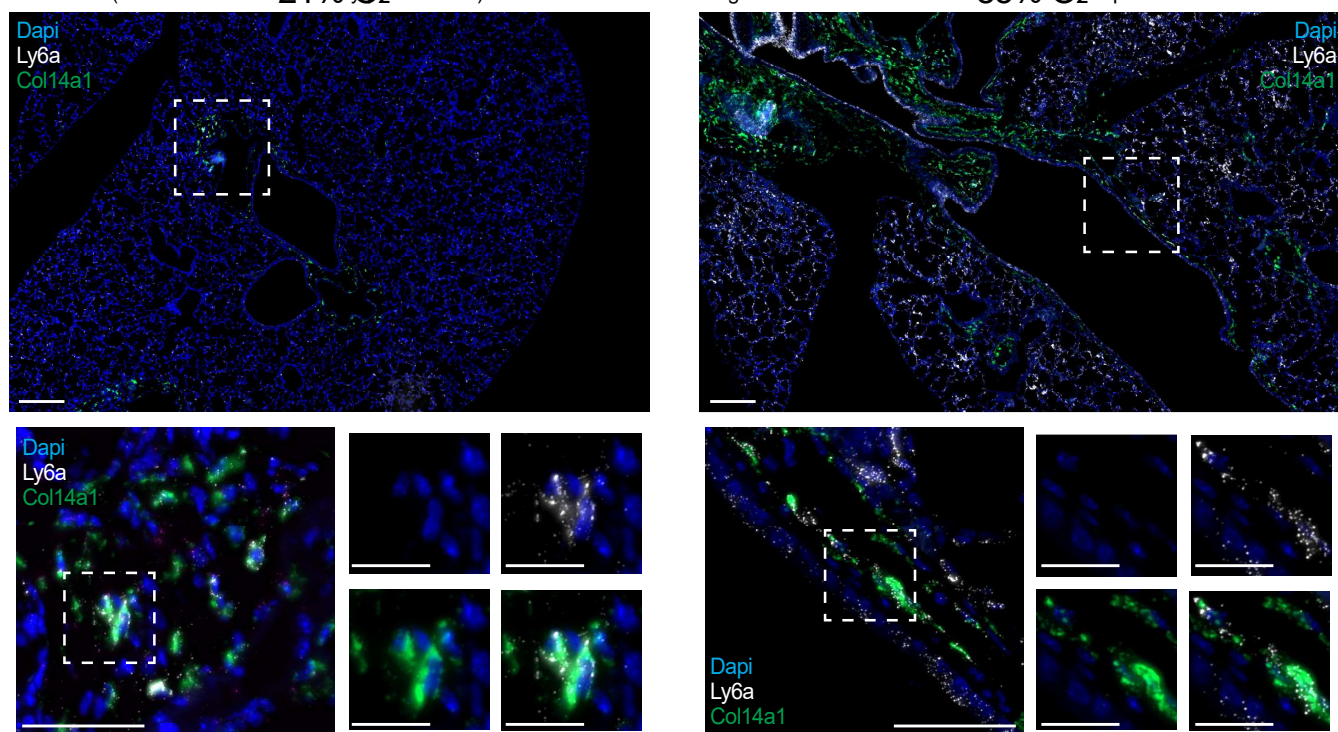

B

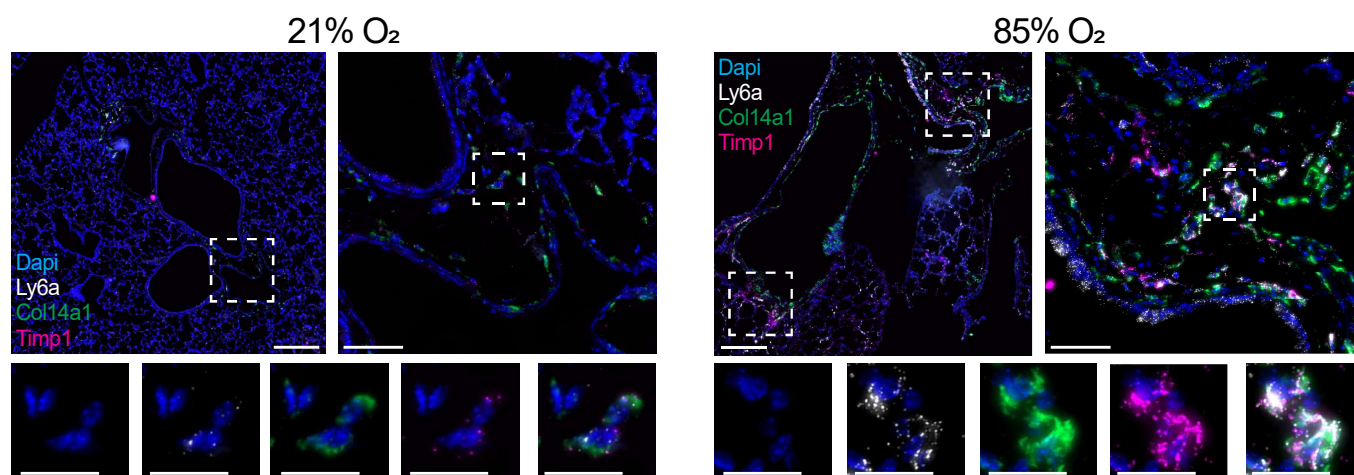

C

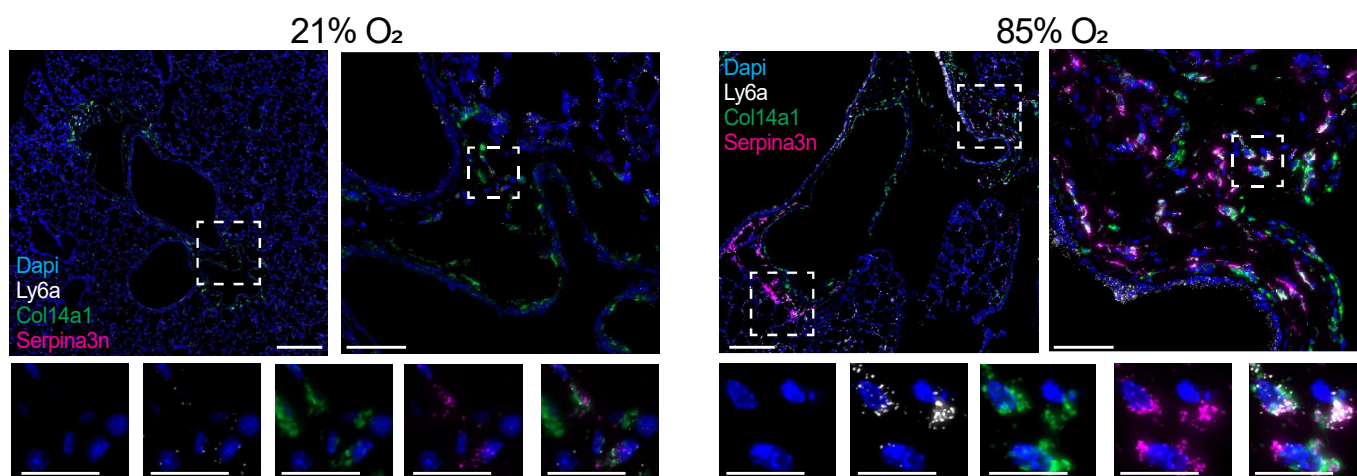

Figure 4



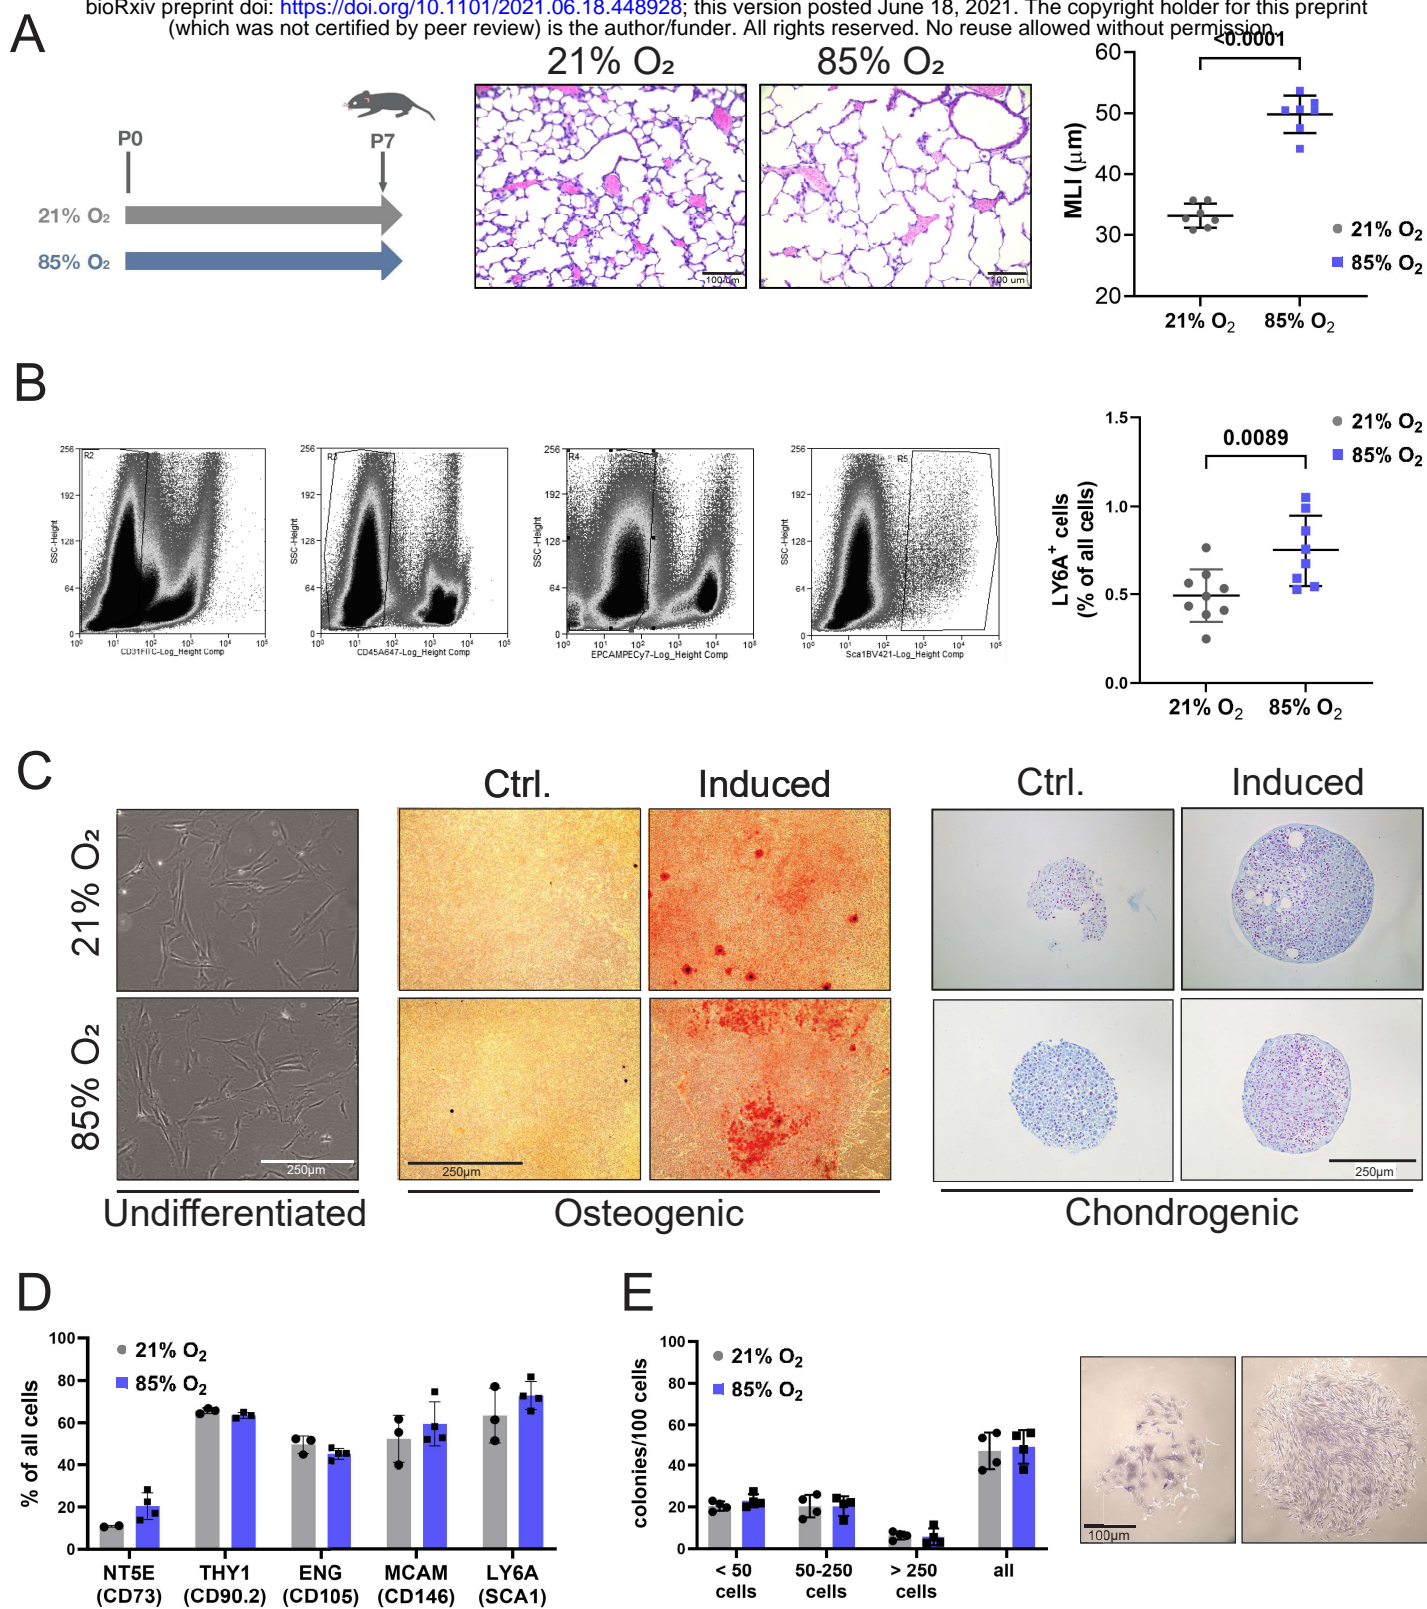

Figure 5

A

| Cell population                  | 21% O <sub>2</sub> | 85% O <sub>2</sub> |      |
|----------------------------------|--------------------|--------------------|------|
| LR-MSC (LY6A <sup>+</sup> )      | 2579               | 2565               | 5144 |
| Lung stroma (LY6A <sup>-</sup> ) | 6084               | 3793               | 9877 |

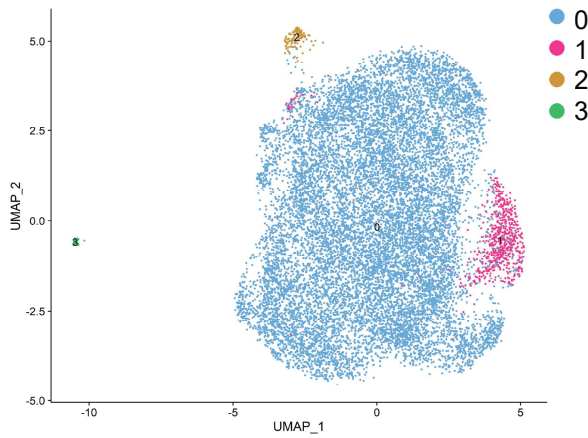

B

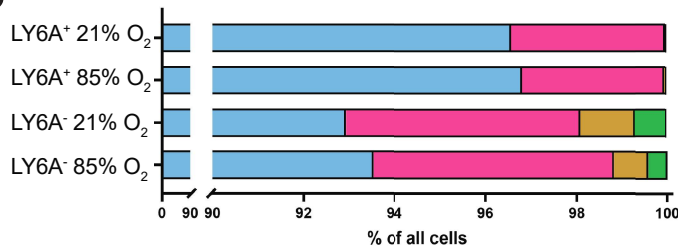

C

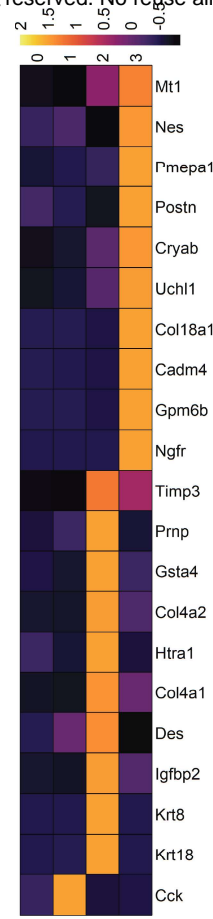

D

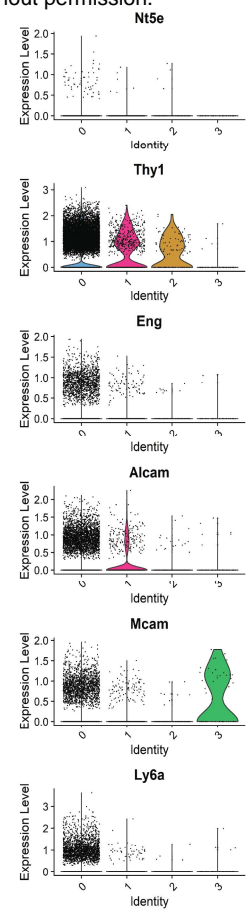

E

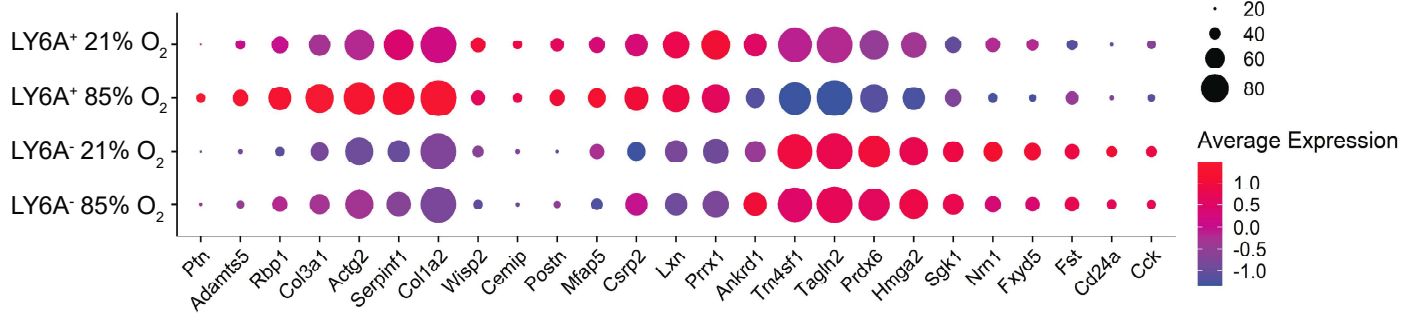

Figure 6

## A Expression in the *in situ* lung stromal cells

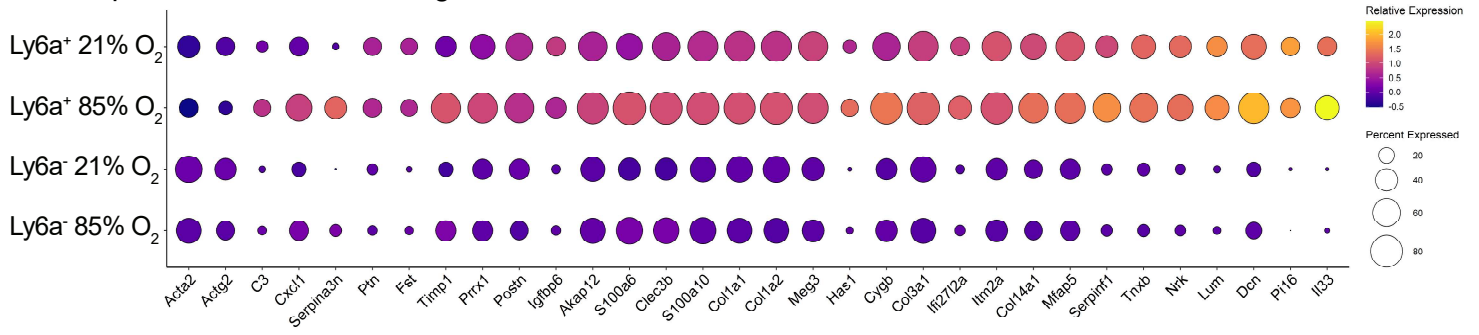

## B Expression in the cultured lung stromal cells

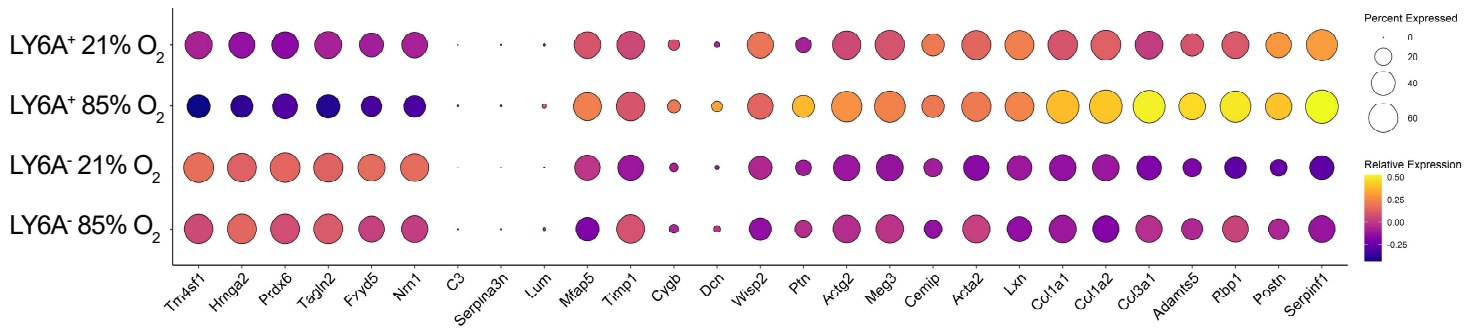

## C

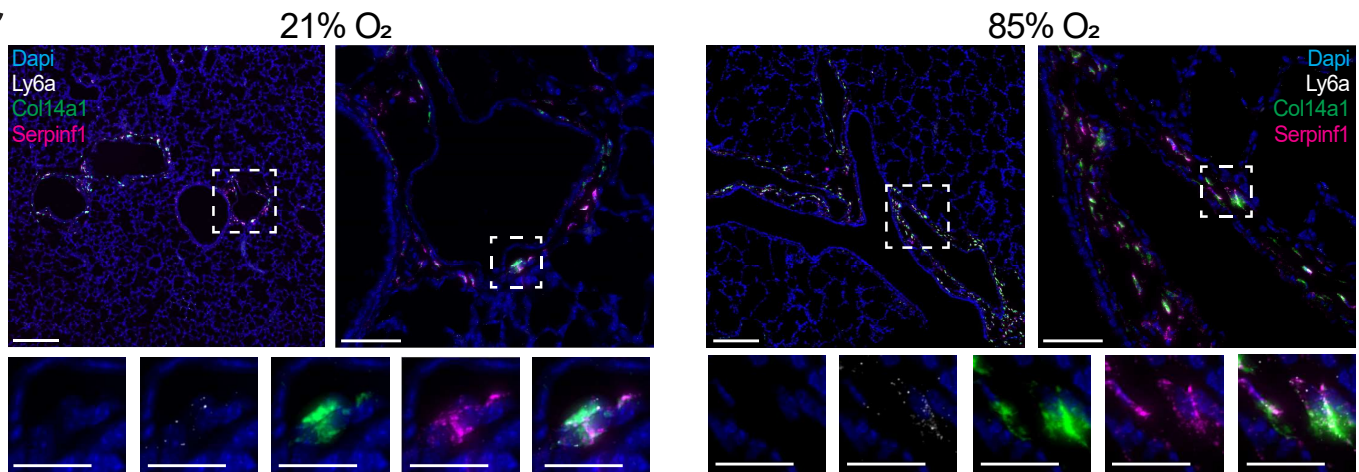

Figure 7





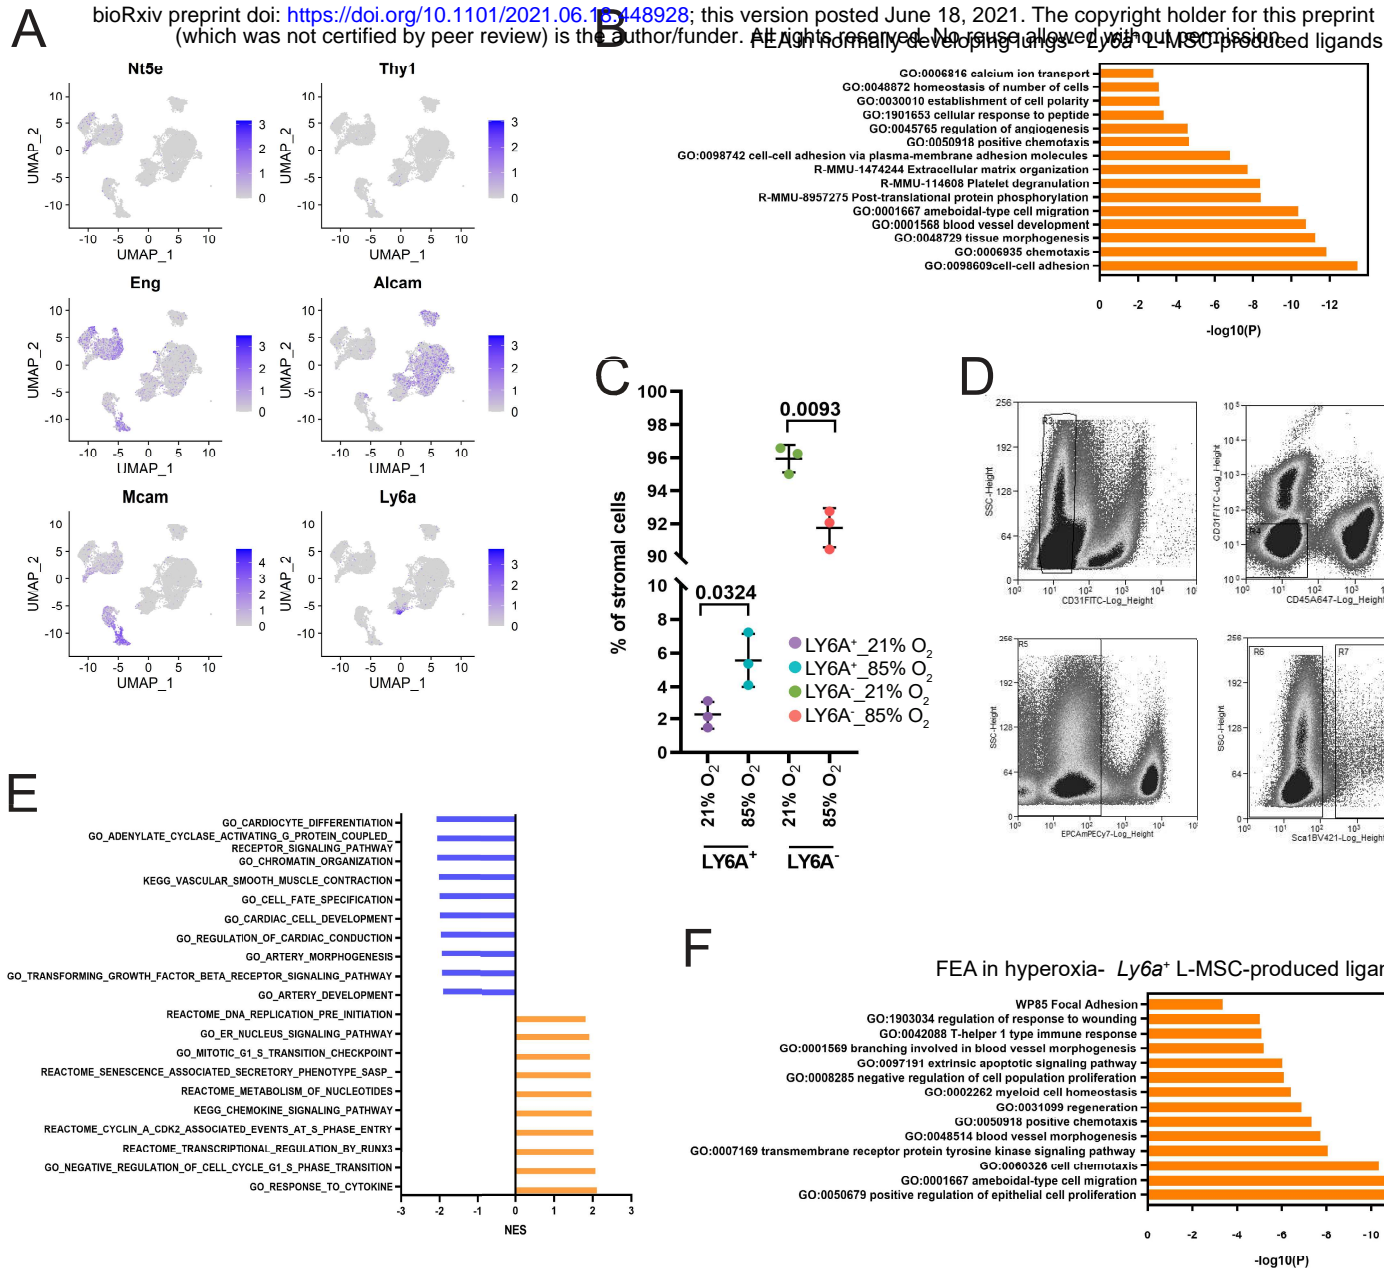

**G** Expression in the *in situ* lung stromal cells

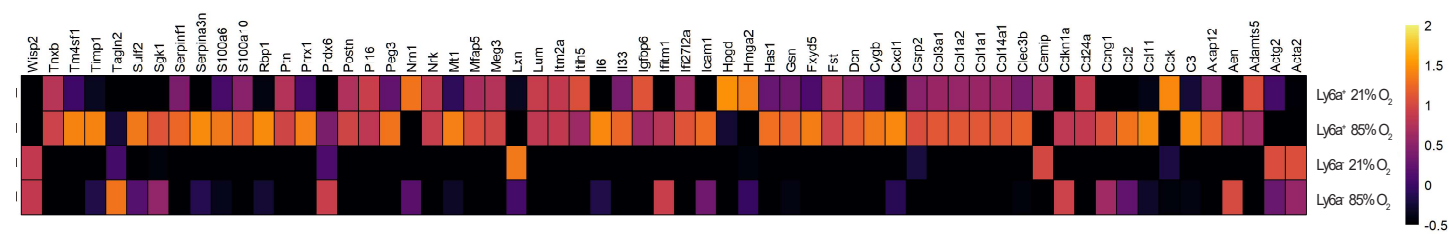

**H** Expression in the cultured lung stromal cells

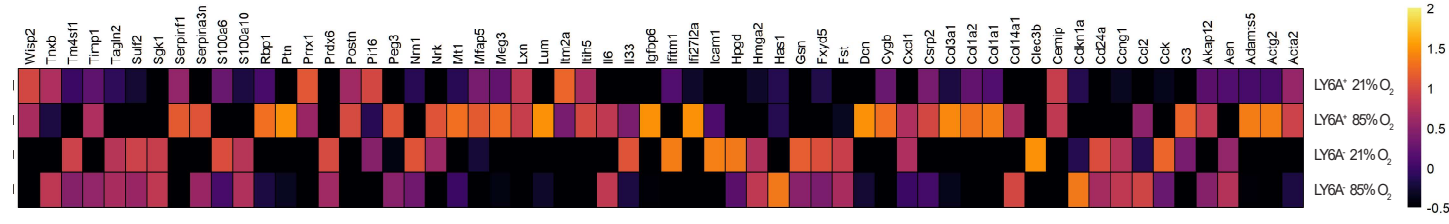









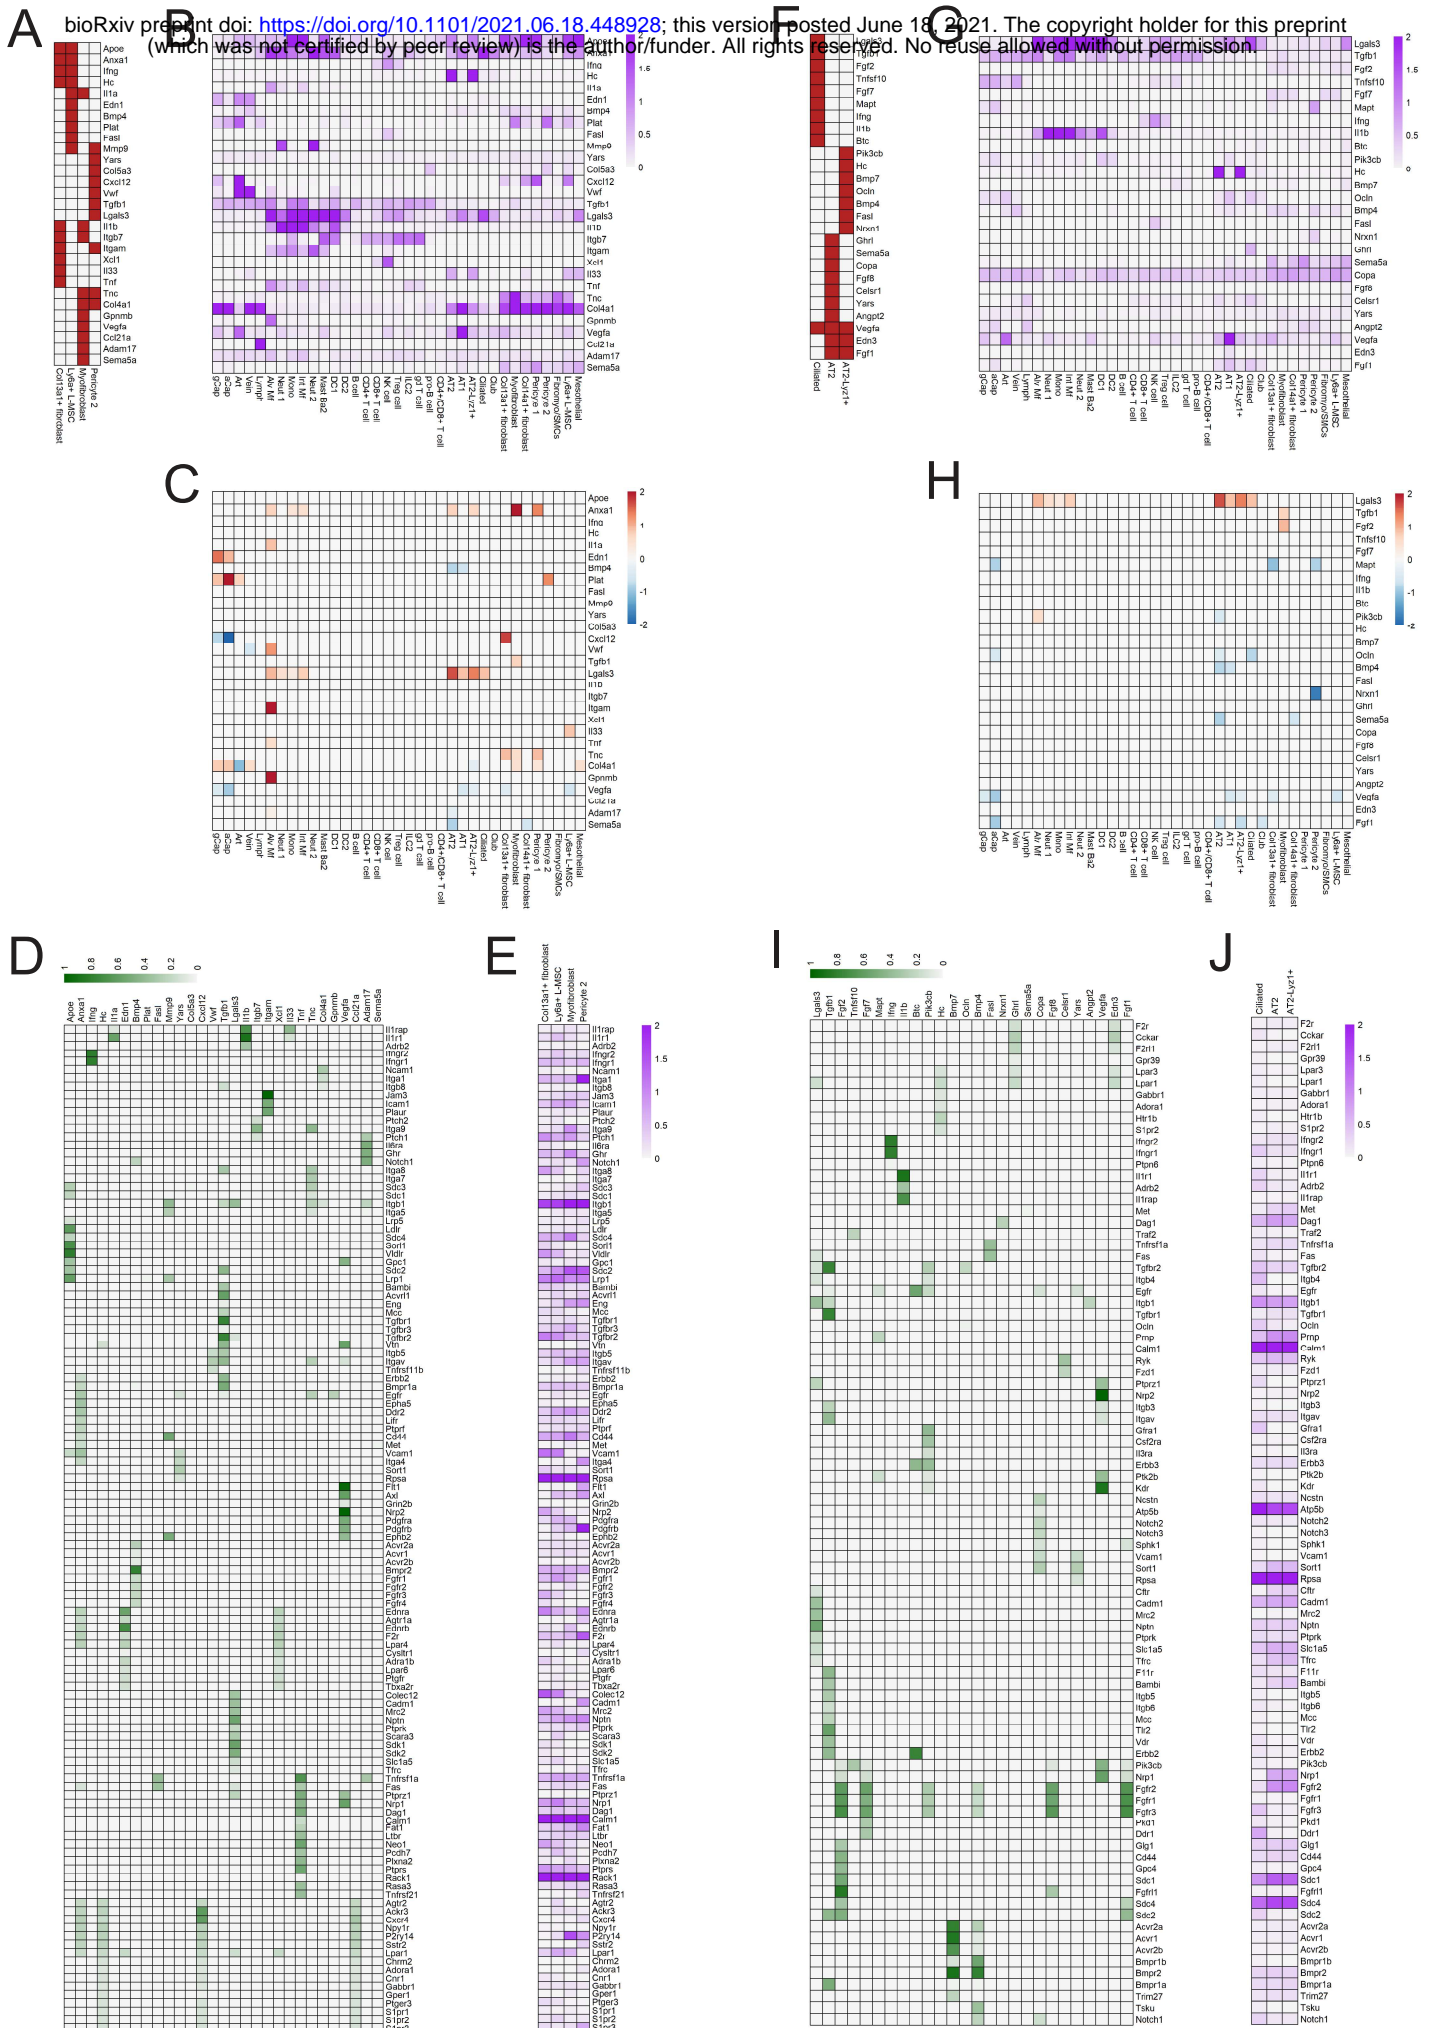

Supplementary Figure 6



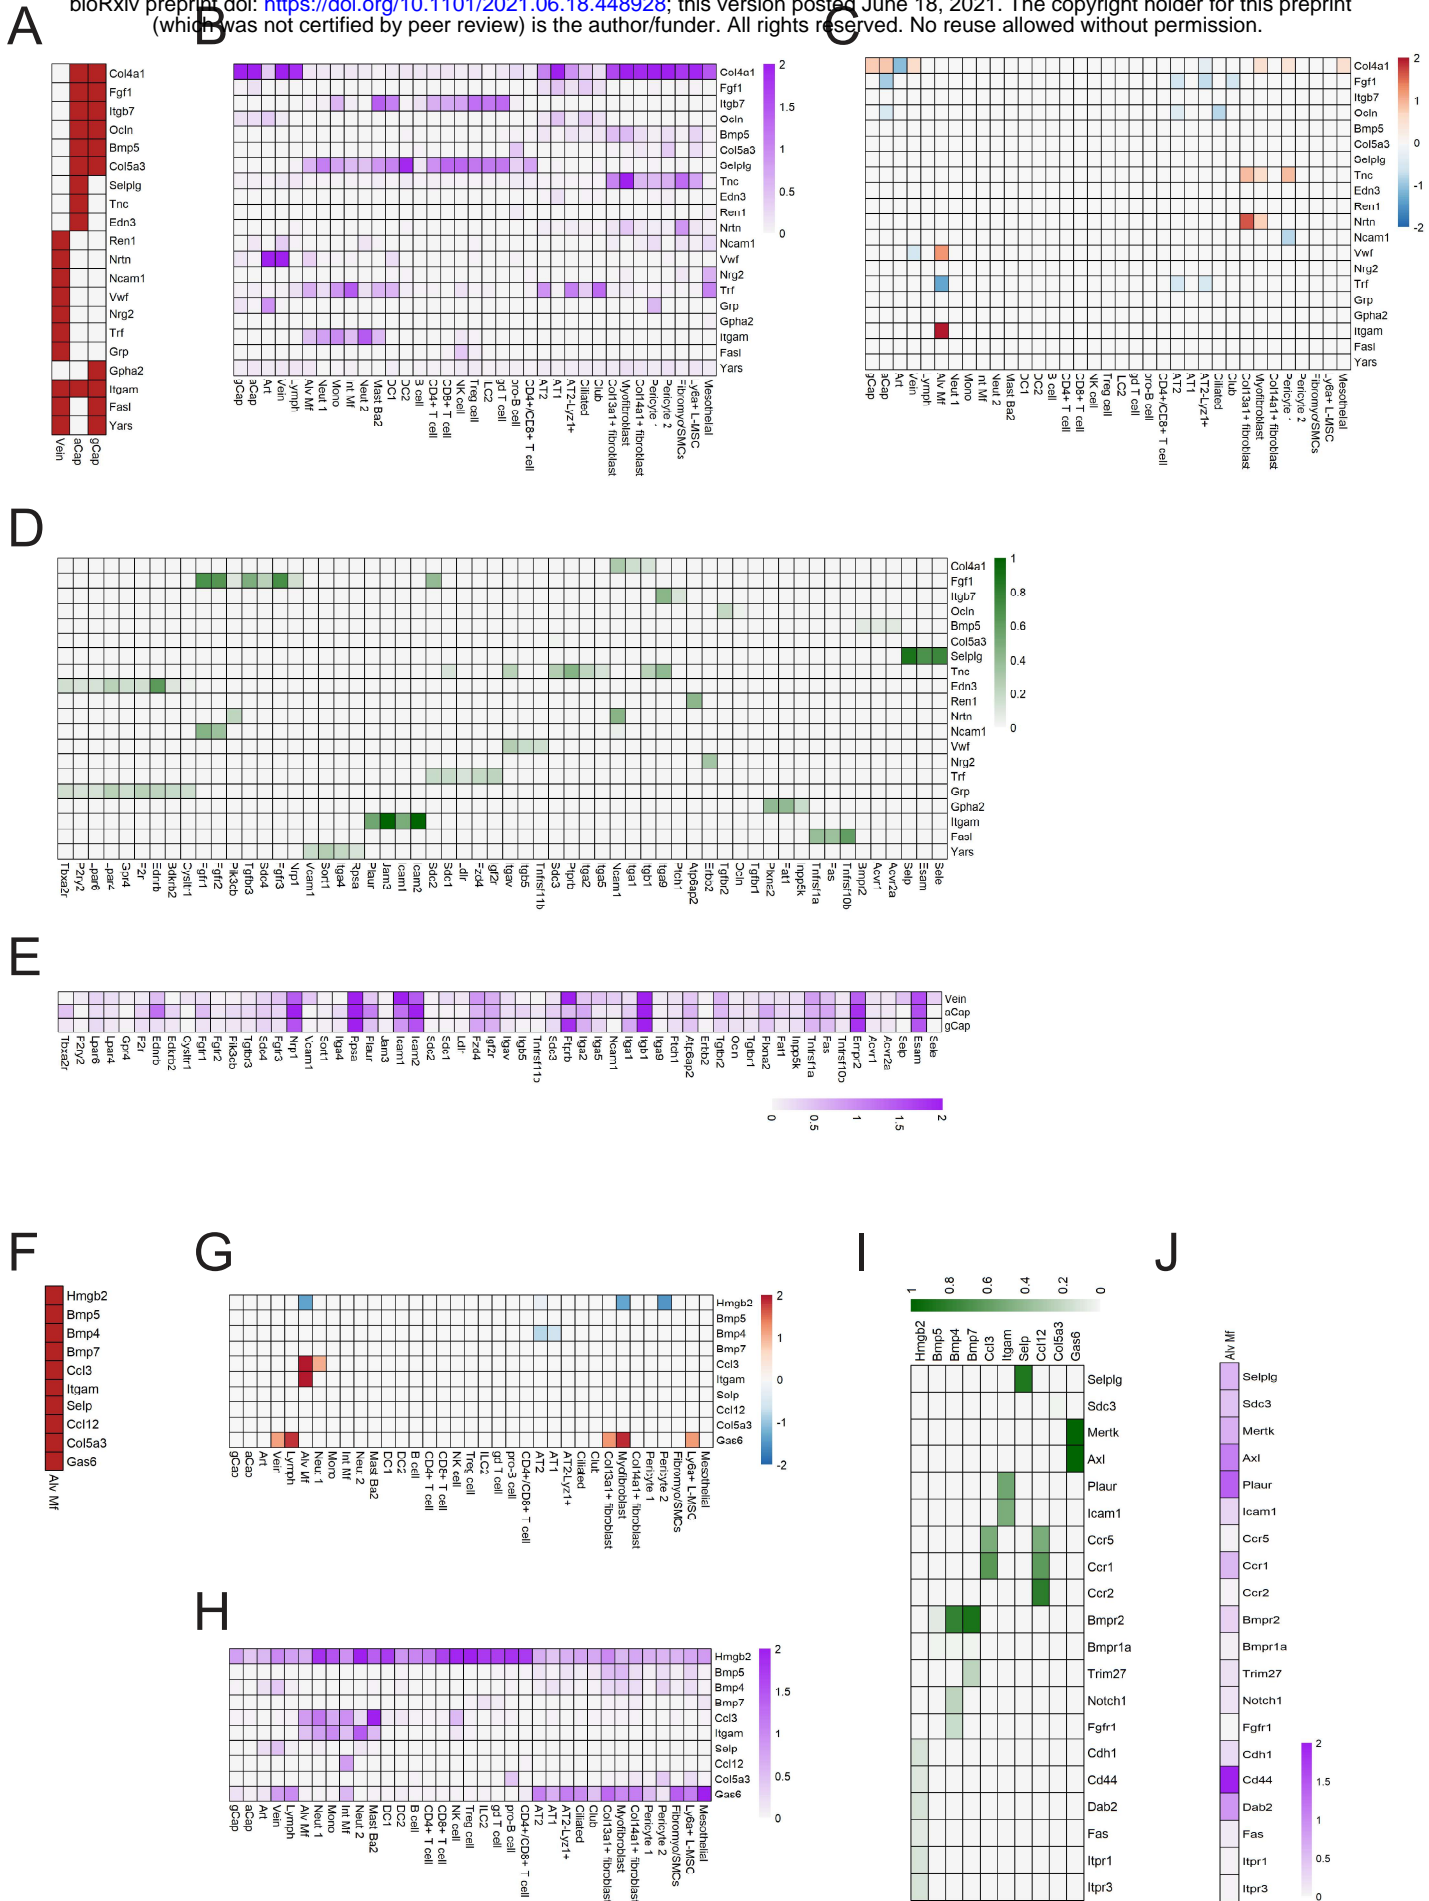

**Figure 1. Gene expression profile of  $Ly6a^+$  L-MSCs during late lung development.** (A) Six clusters of stromal cells were previously identified in developing lungs. In the dataset re-analyzed here mice were exposed to room air (21% O<sub>2</sub>) or hyperoxia (85%O<sub>2</sub>) from P1 onwards and lungs were harvested at P3, P7 and P14. (B) UMAP plots showing the expression of  $Ly6a$  mRNA (left panel) within the lung stroma and new cluster identities, including the  $Ly6a^+$  L-MSCs. (C) Heatmap of top ten most differentially expressed genes across stromal clusters depicted in panel (B). (D) Dotplot depicting expression of routine MSC markers in lung stromal populations. (E) UMAP plots depicting the distribution of lung stromal cells based on the developmental age and oxygen exposure. (F) Relative contribution of  $Ly6a^+$  and  $Ly6a^-$  cells in developing lung stroma at P3, P7 and P14. n = 6 animals/group. Data are presented as means  $\pm$  SD. Statistical analyses were performed with GraphPad Prism 8.0 and the presence of potential statistical outliers was determined by Grubbs' test. Significance was evaluated by multiple unpaired Student's *t*-test with Holm-Šidák correction for  $Ly6a^+$  and  $Ly6a^-$  cells separately. *P* values < 0.05 were considered significant and are depicted. (G) Dotplot depicting the expression of most differentially expressed genes in  $Ly6a^+$  L-MSCs during normal lung development. (H) Dotplot depicting the expression of genes that are differentially expressed specifically in  $Ly6a^+$  L-MSCs and not in other lung stromal clusters during normal lung development. (I) Selected developmental age-associated signalling pathways in the  $Ly6a^+$  L-MSCs cluster identified by gene set enrichment analysis (GSEA). All terms are significantly enriched (adjusted p-value < 0.05). Normalized enrichment scores (NES) values were computed by gene set enrichment analysis on fold change-ranked genes. Expression values in Heatmap represent Z-score-transformed log(TP10k+1) values. Expression levels in Dotplots and UMAP plots are presented as log(TP10k+1) values. Log(TP10k+1) corresponds to log-transformed UMIs per 10k.

Data depicted in 1A were adapted from Hurskainen M, Mižiková I, Cook DP, et al. *Single cell transcriptomic analysis of murine lung development on hyperoxia-induced damage*. Nat Commun 2021;12:1565.

**Figure 2. Age-associated gene expression and signalling in the developing  $Ly6a^+$  L-MSCs.** (A) Circos plot showing inferred cell communications between  $Ly6a^+$  L-MSCs and other populations in the developing mouse lung. Cell communications associated with increasing developmental age are depicted. Cell types in the top right correspond to receiver populations with the largest

expression changes in response to increasing age. These cell types are connected to the sender cell types expressing ligands predicted to promote this response. Ligands expressed by the same cell population are coloured the same. **(B)** Heatmap depicting predicted target genes for ligands most likely to be received by normally developing *Ly6a*<sup>+</sup> L-MSK population as indicated in **(A)**. The intensity of expression is indicated as specified by the colour legend. **(C)** Heatmap depicting predicted target genes for ligands sent by *Ly6a*<sup>+</sup> L-MSK population in normally developing lungs as indicated in **(A)**. The intensity of expression is indicated as specified by the colour legend.

**Figure 3. Hyperoxia-induced gene expression and signalling in the developing *Ly6a*<sup>+</sup> L-MSKs.** **(A)** Dotplot depicting the expression of markers specifically altered by hyperoxia exposure in *Ly6a*<sup>+</sup> and *Ly6a*<sup>-</sup> cells in the developing mouse lung. **(B)** Selected hyperoxia-regulated signalling pathways in the *Ly6a*<sup>+</sup> L-MSK cluster identified by gene set enrichment analysis (GSEA). All terms are significantly enriched (adjusted p-value < 0.05). Normalized enrichment scores (NES) values were computed by gene set enrichment analysis on fold change-ranked genes. **(C)** Circos plot showing inferred cell communications between *Ly6a*<sup>+</sup> L-MSKs and other populations in the developing mouse lung. Cell communications induced by exposure to hyperoxia are depicted. Cell types in the top right correspond to receiver populations with the largest expression changes in response to hyperoxia. These cell types are connected to the sender cell types expressing ligands predicted to promote this response. Ligands expressed by the same cell population are coloured the same. **(D)** Heatmap depicting predicted target genes for ligands most likely to be received by *Ly6a*<sup>+</sup> L-MSK population in hyperoxia as indicated in **(C)**. The intensity of expression is indicated as specified by the colour legend. **(E)** Heatmap depicting predicted target genes for ligands sent by *Ly6a*<sup>+</sup> L-MSK population in hyperoxia as indicated in **(C)**. The intensity of expression is indicated as specified by the colour legend.

**Figure 4. Identification of *Ly6a*<sup>+</sup> L-MSKs in the developing lung.** **(A)** Fluorescent RNA *in situ* hybridization showing localization of L-MSKs identified by the co-expression of *Ly6a* (white) and *Coll4a1* (green) in lungs of room air (21% O<sub>2</sub>) or hyperoxia (85%O<sub>2</sub>)-exposed developing mice. Scale bar = 200µm for low-magnification (5×, top panels) windows, 50µm for higher-magnification (40×, bottom left panels) windows, and 20µm for high-magnification (63×, bottom right panels) windows. Four 14-days old animals/group were analysed. Expression levels in

Dotplot are presented as  $\log(\text{TP10k}+1)$  values.  $\log(\text{TP10k}+1)$  corresponds to log-transformed UMIs per 10k. **(B)** Fluorescent RNA *in situ* hybridization showing co-expression of *Ly6a* (white), *Coll4a1* (green), and *Timp1* (pink) in lungs of room air (21% O<sub>2</sub>) or hyperoxia (85%O<sub>2</sub>)-exposed developing mice. Scale bar = 200 $\mu\text{m}$  for low-magnification (5 $\times$ , top left) windows, 50 $\mu\text{m}$  for higher-magnification (40 $\times$ , top right) windows, and 20 $\mu\text{m}$  for high-magnification (63 $\times$ , bottom panels) windows. Four 14-days old animals/group were analysed. **(C)** Fluorescent RNA *in situ* hybridization showing co-expression of *Ly6a* (white), *Coll4a1* (green), and *Serpina3n* (pink) in lungs of room air (21% O<sub>2</sub>) or hyperoxia (85%O<sub>2</sub>)-exposed developing mice. Scale bar = 200 $\mu\text{m}$  for low-magnification (5 $\times$ , top left) windows, 50 $\mu\text{m}$  for higher-magnification (40 $\times$ , top right) windows, and 20 $\mu\text{m}$  for high-magnification (63 $\times$ , bottom panels) windows. Four 14-days old animals/group were analysed.

**Figure 5. Characterization of LY6A<sup>+</sup> L-MSCs in normal and impaired mouse lung development.** **(A)** Mouse pups were exposed to room air (21% O<sub>2</sub>, grey) or hyperoxia (85%O<sub>2</sub>, blue) from P1 onwards. Mice were harvested on postnatal day (P)7. Representative histological sections from lungs developing in 21% O<sub>2</sub> or 85% O<sub>2</sub>. Lung morphometry was quantified by the mean linear intercept (MLI) measurement. n = 7 animals/group. Scale bar = 100 $\mu\text{m}$ . **(B)** LY6A<sup>+</sup> L-MSCs were identified by flow cytometry as CD45-AF647<sup>-</sup>/CD31-FITC<sup>-</sup>/CD326(EPCAM)-PeCy7/LY6A(SCA1)-BV421<sup>+</sup> cells and their proportion in lung homogenates was quantified. n = 8-9 animals/group. **(C)** Representative images of undifferentiated LY6A<sup>+</sup> L-MSCs and LY6A<sup>+</sup> L-MSCs differentiated towards osteogenic and chondrogenic lineages and stained with Alizarin Red S or Alcian Blue, respectively. Scale bar = 250 $\mu\text{m}$ . Experiments were performed in quadruplets. **(D)** Expression of routine MSCs surface markers in cultured LY6A<sup>+</sup> L-MSCs isolated from room air (21% O<sub>2</sub>, grey bars) or hyperoxia-exposed (85%O<sub>2</sub>, purple bars) developing pups as determined by flow cytometry. n = 3-4 animals/group. **(E)** Quantification and representative images of colony formation of cultured LY6A<sup>+</sup> L-MSCs isolated from room air (21% O<sub>2</sub>, grey bars) or hyperoxia-exposed (85%O<sub>2</sub>, purple bars). n = 4 animals/group. Scale bar =100 $\mu\text{m}$ . All data are presented as means  $\pm$  SD. Statistical analyses were performed with GraphPad Prism 8.0. The presence of potential statistical outliers was determined by Grubbs' test. Significance was evaluated by unpaired Student's *t*-test for analysis in panels (A) and (B), and by multiple unpaired Student's *t*-

test with Holm-Šidák correction in panels (D) and (E).  $P$  values  $< 0.05$  were considered significant and are depicted.

**Figure 6. Gene expression profile of cultured normoxia and hyperoxia-derived LY6A<sup>+</sup> L- MSCs.** (A) LY6A<sup>+</sup> and LY6A<sup>-</sup> stromal cells isolated from lungs of room air (21% O<sub>2</sub>) or hyperoxia (85%O<sub>2</sub>)-exposed developing mice were frozen, cultured and sequenced at passage 3.  $n = 3$  animals/group. scRNA-seq identified four clusters of cultured LY6A<sup>+</sup> and LY6A<sup>-</sup> stromal cells. (B) Relative distribution of room air (21% O<sub>2</sub>) or hyperoxia (85%O<sub>2</sub>)-derived LY6A<sup>+</sup> and LY6A<sup>-</sup> cells to the four different clusters.  $n = 3$  animals/group. (C) Heatmap of top ten most differentially expressed genes across clusters depicted in panel (A). (D) Violin plots depicting expression of routine MSC markers in cultured stromal populations. (E) Dotplot depicting expression of oxygen-specific markers in LY6A<sup>+</sup> and LY6A<sup>-</sup> cultured lung stromal cells. Expression values in Heatmap and violin plots represent Z-score-transformed  $\log(\text{TP10k}+1)$  values. Expression levels in Dotplot and UMAP plot are presented as  $\log(\text{TP10k}+1)$  values.  $\log(\text{TP10k}+1)$  corresponds to log-transformed UMIs per 10k.

**Figure 7. Identification of novel markers for *in situ* and cultured Ly6a<sup>+</sup> L-MSCs.**

(A) Identifying markers were first established in the *in situ*, or cultured Ly6a<sup>+</sup> and Ly6a<sup>-</sup> lung stromal cells based on Supplementary figures 1G-H. Dotplot depicts the expression levels of those markers, most suitable for identification of Ly6a<sup>+</sup> and Ly6a<sup>-</sup> lung stromal cells *in situ* in normoxic or hyperoxic animals at P7. (B) Identifying markers were first established in the *in situ*, or cultured Ly6a<sup>+</sup> and Ly6a<sup>-</sup> lung stromal cells based on Supplementary figures 1G-H. Dotplot depicts the expression levels of those markers, most suitable for identification of normoxia-derived and hyperoxia-derived LY6A<sup>+</sup> and LY6A<sup>-</sup> lung stromal cells in culture. (C) Fluorescent RNA *in situ* hybridization showing co-expression of Ly6a (white), Coll4a1 (green), and Serpinf1 (pink) in lungs of room air (21% O<sub>2</sub>) or hyperoxia (85%O<sub>2</sub>)-exposed developing mice. Scale bar = 200 $\mu\text{m}$  for low-magnification (5 $\times$ , top left) windows, 50 $\mu\text{m}$  for higher-magnification (40 $\times$ , top right) windows, and 20 $\mu\text{m}$  for high-magnification (63 $\times$ , bottom panels) windows. Four 14-days old animals/group were analysed.

**Supplementary figure 1. Flowchart depicting the allocation of mice to experimental groups.**



Flowchart illustrating the group identity of mice sacrificed for the purposes of the present study. Purple color depicts the groups allocated to hyperoxia (85% O<sub>2</sub>). Mice sacrificed as a part of previously published scRNA-seq dataset from developing newborn mice are not included.

### **Supplementary figure 2. Identification of *Ly6a*<sup>+</sup> L-MSCs in the developing lung.**

(A) UMAP plots depicting the expression of commonly used MSC markers in lung stromal cells isolated from lungs of room air (21% O<sub>2</sub>) or hyperoxia (85%O<sub>2</sub>)-exposed developing mice. (B) Metascape functional enrichment analysis for ligands indicated in Fig. 2C. Developmental age-associated summary pathways relevant to lung are depicted. (C) Quantification of FACS results in lung homogenates. n = 3 animals/group. Data are presented as means ± SD. Significance was evaluated by ordinary one-way ANOVA with Tukey multiple comparisons correction test. *P* values < 0.05 were considered significant and are depicted. LY6A<sup>+</sup> (D) L-MSCs were isolated from developing mice at P7 and identified by flow cytometry as CD45<sup>-</sup>/CD31<sup>-</sup>/CD326(EPCAM)<sup>-</sup>/LY6A(SCA1)<sup>+</sup> cells. n = 3 animals/group. (E) Selected hyperoxia-regulated signalling pathways specific only to the *Ly6a*<sup>+</sup> L-MSC cluster identified by gene set enrichment analysis (GSEA). All terms are significantly enriched (adjusted p-value < 0.05). Normalized enrichment scores (NES) values were computed by gene set enrichment analysis on fold change-ranked genes. (F) Metascape functional enrichment analysis for ligands indicated in Fig. 3E. Hyperoxia-regulated summary pathways relevant to lung are depicted. (G) Identifying markers were first established in the P7 *in situ*, or cultured *Ly6a*<sup>+</sup> and *Ly6a*<sup>-</sup> lung stromal cells based on Supplementary tables 4, 15, 16, 17 and 18, as well as Fig. 3A and 6E. The expression levels of these identifying markers are depicted here in the *in situ* lung stromal cells from the room air or hyperoxia-exposed mice at P7. The intensity of expression is indicated as specified by the colour legend. (H) Identifying markers were first established in the P7 *in situ*, or cultured *Ly6a*<sup>+</sup> and *Ly6a*<sup>-</sup> lung stromal cells based on Supplementary tables 4, 15, 16, 17 and 18, as well as Fig. 3A and 6E. The expression levels of these identifying markers are depicted here in the cultured lung stromal cells from the room air or hyperoxia-exposed mice. The intensity of expression is indicated as specified by the colour legend. Expression values in Heatmap represent Z-score-transformed log(TP10k+1) values. Log(TP10k+1) corresponds to log-transformed UMIs per 10k.

**Supplementary figure 3. Developmental age-associated ligand and receptor activity affecting lung endothelial and epithelial populations.** Panels A-E relate to endothelial populations, panels F-J relate to epithelial populations. **(A, F)** Heatmap depicting top 10 ligands predicted to affect the listed lung cell populations (coloured red). **(B, G)** Heatmap depicting average  $\log(\text{TP10k}+1)$  expression values of ligands for each cell population in the P14 samples (depicted in violet). **(C, H)** Heatmap depicting the  $\log(\text{fold change})$  expression of ligands in the P14 samples (depicted in red/blue). **(D, I)** Heatmap depicting putative receptors for each ligand according to the prior interaction potential in NicheNet's model (depicted in green). **(E, J)** Heatmap depicting average  $\log(\text{TP10k}+1)$  expression values of receptors for each cell population (depicted in violet). Expression values in violin plots represent Z-score-transformed  $\log(\text{TP10k}+1)$  values. Expression levels in UMAP plots and Dotplots are presented as  $\log(\text{TP10k}+1)$  values.  $\log(\text{TP10k}+1)$  corresponds to log-transformed UMIs per 10k.

**Supplementary figure 4. Developmental age-associated ligand and receptor activity affecting lung stromal and myeloid populations.** Panels A-E relate to stromal populations, panels F-J relate to myeloid populations. **(A, F)** Heatmap depicting top 10 ligands predicted to affect the listed lung cell populations (coloured red). **(B, G)** Heatmap depicting average  $\log(\text{TP10k}+1)$  expression values of ligands for each cell population in the P14 samples (depicted in violet). **(C, H)** Heatmap depicting the  $\log(\text{fold change})$  expression of ligands in the P14 samples (depicted in red/blue). **(D, I)** Heatmap depicting putative receptors for each ligand according to the prior interaction potential in NicheNet's model (depicted in green). **(E, J)** Heatmap depicting average  $\log(\text{TP10k}+1)$  expression values of receptors for each cell population (depicted in violet). Expression values in violin plots represent Z-score-transformed  $\log(\text{TP10k}+1)$  values. Expression levels in UMAP plots and Dotplots are presented as  $\log(\text{TP10k}+1)$  values.  $\log(\text{TP10k}+1)$  corresponds to log-transformed UMIs per 10k.

**Supplementary figure 5. Developmental age-associated ligand and receptor activity affecting lung lymphoid and mesothelial populations.** Panels A-E relate to lymphoid populations, panels F-J relate to mesothelial populations. **(A, F)** Heatmap depicting top 10 ligands predicted to affect the listed lung cell populations (coloured red). **(B, G)** Heatmap depicting average  $\log(\text{TP10k}+1)$

expression values of ligands for each cell population in the P14 samples (depicted in violet). **(C, H)** Heatmap depicting the log(fold change) expression of ligands in the P14 samples (depicted in red/blue). **(D, I)** Heatmap depicting putative receptors for each ligand according to the prior interaction potential in NicheNet's model (depicted in green). **(E, J)** Heatmap depicting average log(TP10k+1) expression values of receptors for each cell population (depicted in violet). Expression values in violin plots represent Z-score-transformed log(TP10k+1) values. Expression levels in UMAP plots and Dotplots are presented as log(TP10k+1) values. Log(TP10k+1) corresponds to log-transformed UMIs per 10k.

**Supplementary figure 6. Hyperoxia-induced ligand and receptor activity affecting lung stromal and epithelial populations.** Panels A-E relate to stromal populations, panels F-J relate to epithelial populations. **(A, F)** Heatmap depicting top 10 ligands predicted to affect the listed lung cell populations (coloured red). **(B, G)** Heatmap depicting average log(TP10k+1) expression values of ligands for each cell population in the hyperoxia samples (depicted in violet). **(C, H)** Heatmap depicting the log(fold change) expression of ligands in hyperoxia samples (depicted in red/blue). **(D, I)** Heatmap depicting putative receptors for each ligand according to the prior interaction potential in NicheNet's model (depicted in green). **(E, J)** Heatmap depicting average log(TP10k+1) expression values of receptors for each cell population (depicted in violet). Expression values in violin plots represent Z-score-transformed log(TP10k+1) values. Expression levels in UMAP plots and Dotplots are presented as log(TP10k+1) values. Log(TP10k+1) corresponds to log-transformed UMIs per 10k.

**Supplementary figure 7. Hyperoxia-induced ligand and receptor activity affecting lung endothelial and myeloid populations.** Panels A-E relate to endothelial populations, panels F-J relate to myeloid populations. **(A, F)** Heatmap depicting top 10 ligands predicted to affect the listed lung cell populations (coloured red). **(B, G)** Heatmap depicting average log(TP10k+1) expression values of ligands for each cell population in the hyperoxia samples (depicted in violet). **(C, H)** Heatmap depicting the log(fold change) expression of ligands in hyperoxia samples (depicted in red/blue). **(D, I)** Heatmap depicting putative receptors for each ligand according to the prior interaction potential in NicheNet's model (depicted in green). **(E, J)** Heatmap depicting average log(TP10k+1) expression values of receptors for each cell population (depicted in violet).

Expression values in violin plots represent Z-score-transformed  $\log(\text{TP10k}+1)$  values. Expression levels in UMAP plots and Dotplots are presented as  $\log(\text{TP10k}+1)$  values.  $\text{Log}(\text{TP10k}+1)$  corresponds to log-transformed UMIs per 10k.
